# Supplementary material for: Changes in the Rumen Bacteriome Structure and Enzymatic Activities of Goats in Response to Dietary Supplementation with Schizochytrium spp.
Source: MDPI journal article supplement (doi:10.3390/microorganisms9071528), 2021-07-17
Supplement: s1 [file s1]

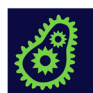

Table S1. Libraries concentrations measured with Picogreen.

| Sample barcode | Animal | ng/uL  |
|----------------|--------|--------|
| 193281         | 199A   | 80.24  |
| 193282         | 1340A  | 65.00  |
| 193283         | 1844A  | 86.09  |
| 193284         | 1717A  | 38.52  |
| 193285         | 1719A  | 77.64  |
| 193286         | 1711A  | 69.72  |
| 193287         | 1718A  | 49.84  |
| 193288         | 66A    | 39.54  |
| 193289         | 63A    | 44.11  |
| 193290         | 68A    | 45.64  |
| 193291         | 1259A  | 49.77  |
| 193292         | 965A   | 70.99  |
| 193293         | 100A   | 93.02  |
| 193294         | 1842A  | 84.88  |
| 193295         | 1846A  | 87.97  |
| 193296         | 1841A  | 40.65  |
| 193297         | 1713A  | 82.38  |
| 193298         | 1362A  | 18.40  |
| 193299         | 1257A  | 98.72  |
| 193300         | 1258A  | 47.41  |
| 193301         | 199B   | 64.32  |
| 193302         | 1340B  | 62.17  |
| 193303         | 1844B  | 98.65  |
| 193304         | 1717B  | 79.46  |
| 193305         | 1719B  | 93.65  |
| 193306         | 1711B  | 73.33  |
| 193307         | 1718B  | 107.97 |
| 193308         | 66B    | 34.87  |
| 193309         | 63B    | 63.05  |
| 193310         | 68B    | 64.08  |
| 193311         | 1259B  | 80.31  |
| 193312         | 965B   | 81.75  |
| 193313         | 100B   | 75.45  |
| 193314         | 1842B  | 44.98  |
| 193315         | 1846B  | 92.81  |
| 193316         | 1841B  | 89.55  |
| 193317         | 1713B  | 95.59  |
| 193318         | 1362B  | 87.76  |
| 193319         | 1257B  | 83.92  |
| 193320         | 1258B  | 75.71  |

**Table S2.** Number of sequences, average length, total Mb, and average quality after trimming.

| Group | Animal Num. | Num. Seq | Av. Length | Total Mb | Av. Qual |
|-------|-------------|----------|------------|----------|----------|
| CON   | 199         | 52868    | 403.52     | 21.33    | 37.51    |
|       | 1340        | 48964    | 403.09     | 19.74    | 37.38    |
|       | 1844        | 44267    | 405.16     | 17.94    | 37.44    |
|       | 1717        | 51646    | 404.58     | 20.89    | 37.48    |
|       | 1719        | 53744    | 400.61     | 21.53    | 37.37    |
| ALG20 | 1711        | 57193    | 404.6      | 23.14    | 37.5     |
|       | 1718        | 61984    | 403.99     | 25.04    | 37.46    |
|       | 66          | 54085    | 405.63     | 21.94    | 37.45    |
|       | 63          | 50066    | 407.55     | 20.4     | 37.46    |
|       | 68          | 59904    | 403.54     | 24.17    | 37.5     |
| ALG40 | 1259        | 52494    | 405.53     | 21.29    | 37.39    |
|       | 965         | 53123    | 407.55     | 21.65    | 37.58    |
|       | 100         | 47204    | 403.61     | 19.05    | 37.37    |
|       | 1842        | 47633    | 403.97     | 19.24    | 37.3     |
|       | 1846        | 43895    | 395.29     | 17.35    | 37.19    |
| ALG60 | 1841        | 49339    | 405.16     | 19.99    | 37.36    |
|       | 1713        | 47898    | 399        | 19.11    | 37.19    |
|       | 1362        | 47504    | 403.64     | 19.17    | 37.47    |
|       | 1257        | 91883    | 399.51     | 36.71    | 37.26    |
|       | 1258        | 48478    | 402.26     | 19.5     | 37.36    |
| CON   | 199         | 51667    | 402.48     | 20.79    | 37.22    |
|       | 1340        | 51613    | 402.49     | 20.77    | 37.28    |
|       | 1844        | 49443    | 402.54     | 19.9     | 37.32    |
|       | 1717        | 54387    | 403.88     | 21.97    | 37.46    |
|       | 1719        | 51376    | 402.72     | 20.69    | 37.44    |
| ALG20 | 1711        | 52586    | 403.93     | 21.24    | 37.37    |
|       | 1718        | 117337   | 400.75     | 47.02    | 37.25    |
|       | 66          | 50358    | 405.21     | 20.41    | 37.5     |
|       | 63          | 49665    | 404.43     | 20.09    | 37.46    |
|       | 68          | 57118    | 405.53     | 23.16    | 37.4     |
| ALG40 | 1259        | 50855    | 404.44     | 20.57    | 37.27    |
|       | 965         | 56080    | 401.83     | 22.53    | 37.36    |
|       | 100         | 51283    | 404.67     | 20.75    | 37.28    |
|       | 1842        | 60596    | 406.08     | 24.61    | 37.47    |
|       | 1846        | 51023    | 404.15     | 20.62    | 37.42    |
| ALG60 | 1841        | 50358    | 407.2      | 20.51    | 37.61    |
|       | 1713        | 47381    | 402.35     | 19.06    | 37.38    |
|       | 1362        | 47890    | 402.67     | 19.28    | 37.35    |
|       | 1257        | 49454    | 402.37     | 19.9     | 37.26    |
|       | 1258        | 46574    | 402.42     | 18.74    | 37.39    |

**Table S3.** Relative abundance of identified phyla, unmapped bacteria, and no-clustered sequences (no-hit) in the liquid of rumen of the four dietary treatments (CON, ALG20, ALG40, and ALG60) on two sampling points (20<sup>th</sup> and 40<sup>th</sup> experimental day).

| Phylum          | Treatment (T)      |                     |                    |                     |       | Sampling time (S)  |                    |       | Effect ‡ |        |       |
|-----------------|--------------------|---------------------|--------------------|---------------------|-------|--------------------|--------------------|-------|----------|--------|-------|
|                 | CON                | ALG20               | ALG40              | ALG60               | SEM†  | 20                 | 40                 | SEM†  | T        | S      | T x S |
| Actinobacteria  | 0.125 <sup>a</sup> | 0.083 <sup>ab</sup> | 0.076 <sup>b</sup> | 0.055 <sup>b</sup>  | 0.014 | 0.072 <sup>a</sup> | 0.096 <sup>b</sup> | 0.008 | 0.021    | 0.011  | 0.324 |
| Bacteroidetes   | 18.86 <sup>t</sup> | 21.91               | 22.50 <sup>t</sup> | 18.92               | 1.360 | 19.89              | 21.19              | 0.875 | 0.099    | 0.272  | 0.046 |
| Firmicutes      | 15.66 <sup>a</sup> | 12.35 <sup>b</sup>  | 10.07 <sup>b</sup> | 11.19 <sup>b</sup>  | 0.933 | 12.82              | 11.81              | 0.550 | 0.004    | 0.126  | 0.058 |
| Chloroflexi     | 0.063 <sup>a</sup> | 0.179 <sup>b</sup>  | 0.141 <sup>b</sup> | 0.222 <sup>b</sup>  | 0.028 | 0.168              | 0.134              | 0.020 | 0.007    | 0.297  | 0.025 |
| Elusimicrobia   | 0.387              | 0.147               | 0.271              | 0.327               | 0.058 | 0.197 <sup>a</sup> | 0.368 <sup>b</sup> | 0.035 | 0.056    | 0.001  | 0.079 |
| Euryarchaeota   | 0.106              | 0.131               | 0.053              | 0.078               | 0.024 | 0.087              | 0.097              | 0.017 | 0.163    | 0.662  | 0.007 |
| Fibrobacteres   | 1.642              | 1.792               | 1.441              | 1.186               | 0.269 | 2.151              | 0.879              | 0.151 | 0.439    | <0.001 | 0.361 |
| Fusobacteria    | 0.029              | 0.022               | 0.015              | 0.008               | 0.006 | 0.021              | 0.016              | 0.004 | 0.116    | 0.418  | 0.033 |
| Lentisphaerae   | 0.162              | 0.179               | 0.121              | 0.174               | 0.051 | 0.164              | 0.154              | 0.035 | 0.850    | 0.788  | 0.123 |
| Proteobacteria  | 2.437 <sup>a</sup> | 4.762 <sup>b</sup>  | 5.576 <sup>b</sup> | 3.539 <sup>ab</sup> | 0.654 | 4.670              | 3.487              | 0.423 | 0.019    | 0.075  | 0.025 |
| Spirochaetes    | 1.291              | 0.777               | 0.770              | 0.860               | 0.184 | 1.112 <sup>a</sup> | 0.736 <sup>b</sup> | 0.120 | 0.185    | 0.030  | 0.234 |
| Synergistetes   | 1.133 <sup>a</sup> | 3.287 <sup>b</sup>  | 3.288 <sup>b</sup> | 2.397 <sup>b</sup>  | 0.454 | 2.280              | 2.772              | 0.277 | 0.012    | 0.116  | 0.461 |
| Tenericutes     | 0.508              | 0.528               | 0.246              | 0.482               | 0.145 | 0.485              | 0.398              | 0.078 | 0.503    | 0.324  | 0.219 |
| Verrucomicrobia | 0.003              | 0.003               | 0.004              | 0.002               | 0.001 | 0.004              | 0.002              | 0.001 | 0.597    | 0.057  | 0.205 |
| Unmapped        | 43.79              | 43.44               | 44.60              | 47.57               | 4.895 | 44.23              | 45.51              | 4.32  | 0.141    | 0.801  | 0.454 |
| No-hits         | 13.82 <sup>a</sup> | 10.40 <sup>b</sup>  | 10.83 <sup>b</sup> | 12.95 <sup>a</sup>  | 0.368 | 11.65              | 12.35              | 0.265 | <0.001   | 0.075  | 0.451 |

Means with different superscript (a, b, c, d) between dietary treatments and (a, b) between sampling time differ significantly ( $p \leq 0.05$ ) while, t; trend refers to  $p < 0.10$ . CON = control concentrate without microalgae; ALG20 = control concentrate with 20 g/Kg *Schizochytrium* sp.; ALG40 = control concentrate with 40 g/ Kg *Schizochytrium* sp.; ALG60 = control concentrate with 60 g/ Kg *Schizochytrium* sp. ‡ Effect: The dietary treatment (T), time (S), and the interaction between dietary treatment x time (TxS) effects were analyzed by ANOVA using a general linear model (GLM) for repeated measures and Post hoc analysis was performed when appropriate using Tukey multiple range test. †SEM: Standard error of the mean.

**Table S4.** Relative abundance of identified families in the liquid of rumen of the four dietary treatments (CON, ALG20, ALG40, and ALG60) on two sampling points (20<sup>th</sup> and 40<sup>th</sup> experimental day).

| Family                                           | Treatment (T)       |                     |                     |                     |       | Sampling time (S)  |                    |       | Effect ‡ |         |       |
|--------------------------------------------------|---------------------|---------------------|---------------------|---------------------|-------|--------------------|--------------------|-------|----------|---------|-------|
|                                                  | CON                 | ALG20               | ALG40               | ALG60               | SEM†  | 20                 | 40                 | SEM†  | T        | S       | T x S |
| <i>Prevotellaceae</i>                            | 18.629 <sup>t</sup> | 21.737              | 22.332 <sup>t</sup> | 18.756              | 1.357 | 19.710             | 21.017             | 0.878 | 0.100    | 0.270   | 0.046 |
| <i>Lachnospiraceae</i>                           | 4.157               | 3.896               | 3.111               | 3.386               | 0.357 | 3.610              | 3.665              | 0.217 | 0.194    | 0.847   | 0.101 |
| <i>Succinivibrionaceae</i>                       | 1.927 <sup>a</sup>  | 3.704 <sup>bc</sup> | 4.769 <sup>c</sup>  | 2.750 <sup>ab</sup> | 0.648 | 3.885              | 2.691              | 0.423 | 0.038    | 0.080   | 0.029 |
| <i>Ruminococcaceae</i>                           | 3.838 <sup>a</sup>  | 1.910 <sup>b</sup>  | 1.513 <sup>b</sup>  | 2.212 <sup>b</sup>  | 0.449 | 2.681 <sup>a</sup> | 2.055 <sup>b</sup> | 0.261 | 0.011    | 0.020   | 0.080 |
| <i>Spirochaetaceae</i>                           | 1.291               | 0.777               | 0.770               | 0.860               | 0.184 | 1.112 <sup>a</sup> | 0.736 <sup>b</sup> | 0.120 | 0.185    | 0.030   | 0.234 |
| <i>Synergistaceae</i>                            | 1.133 <sup>a</sup>  | 3.287 <sup>b</sup>  | 3.288 <sup>b</sup>  | 2.397 <sup>ab</sup> | 0.454 | 2.280              | 2.772              | 0.269 | 0.012    | 0.116   | 0.461 |
| <i>Acidaminococcaceae</i>                        | 1.612               | 2.148               | 1.860               | 1.575               | 0.173 | 1.907              | 1.691              | 0.114 | 0.112    | 0.154   | 0.081 |
| <i>Fibrobacteraceae</i>                          | 1.642               | 1.792               | 1.441               | 1.186               | 0.269 | 2.151 <sup>a</sup> | 0.789 <sup>b</sup> | 0.151 | 0.439    | < 0.001 | 0.061 |
| <i>Anaeroplasmataceae</i>                        | 0.504               | 0.526               | 0.244               | 0.481               | 0.145 | 0.481              | 0.396              | 0.075 | 0.505    | 0.312   | 0.251 |
| <i>Selenomonadaceae</i>                          | 1.525               | 1.747               | 1.540               | 1.164               | 0.300 | 1.638              | 1.350              | 0.201 | 0.594    | 0.283   | 0.731 |
| <i>Hungateiclostridiaceae</i>                    | 0.487 <sup>t</sup>  | 0.372               | 0.229 <sup>t</sup>  | 0.382               | 0.066 | 0.473              | 0.263              | 0.037 | 0.089    | < 0.001 | 0.910 |
| <i>Eubacteriaceae</i>                            | 0.514 <sup>a</sup>  | 0.332 <sup>b</sup>  | 0.307 <sup>b</sup>  | 0.333 <sup>b</sup>  | 0.052 | 0.376              | 0.367              | 0.030 | 0.046    | 0.761   | 0.111 |
| <i>Desulfovibrionaceae</i>                       | 0.210 <sup>a</sup>  | 0.780 <sup>b</sup>  | 0.610 <sup>b</sup>  | 0.610 <sup>b</sup>  | 0.114 | 0.574              | 0.531              | 0.067 | 0.018    | 0.566   | 0.887 |
| <i>Oscillospiraceae</i>                          | 0.531               | 0.893               | 0.795               | 0.990               | 0.171 | 0.682              | 0.923              | 0.101 | 0.296    | 0.083   | 0.367 |
| <i>Clostridiales Family XIII. Incertae Sedis</i> | 0.278 <sup>a</sup>  | 0.181 <sup>b</sup>  | 0.155 <sup>b</sup>  | 0.165 <sup>b</sup>  | 0.025 | 0.165 <sup>a</sup> | 0.226 <sup>b</sup> | 0.014 | 0.011    | 0.001   | 0.914 |
| <i>Bacteroidaceae</i>                            | 0.168 <sup>a</sup>  | 0.126 <sup>b</sup>  | 0.122 <sup>b</sup>  | 0.130 <sup>ab</sup> | 0.014 | 0.136              | 0.137              | 0.008 | 0.050    | 0.853   | 0.253 |
| <i>Elusimicrobiaceae</i>                         | 0.201               | 0.076 <sup>t</sup>  | 0.190               | 0.239 <sup>t</sup>  | 0.044 | 0.116 <sup>a</sup> | 0.237 <sup>b</sup> | 0.025 | 0.090    | 0.001   | 0.063 |
| <i>Endomicrobiaceae</i>                          | 0.186 <sup>a</sup>  | 0.072 <sup>b</sup>  | 0.081 <sup>b</sup>  | 0.088 <sup>b</sup>  | 0.023 | 0.082              | 0.131              | 0.018 | 0.009    | 0.128   | 0.589 |
| <i>Oxalobacteraceae</i>                          | 0.017 <sup>a</sup>  | 0.075 <sup>b</sup>  | 0.035 <sup>ab</sup> | 0.004 <sup>a</sup>  | 0.016 | 0.040              | 0.026              | 0.009 | 0.031    | 0.094   | 0.739 |
| <i>Clostridiaceae</i>                            | 0.152               | 0.201               | 0.105               | 0.168               | 0.044 | 0.154              | 0.159              | 0.035 | 0.502    | 0.939   | 0.814 |
| <i>Victivallaceae</i>                            | 0.111               | 0.151               | 0.093               | 0.116               | 0.046 | 0.129              | 0.106              | 0.024 | 0.840    | 0.554   | 0.661 |
| <i>Methanobacteriaceae</i>                       | 0.104               | 0.128 <sup>t</sup>  | 0.046 <sup>t</sup>  | 0.055 <sup>t</sup>  | 0.024 | 0.075              | 0.091              | 0.016 | 0.077    | 0.455   | 0.967 |
| <i>Rhodospirillaceae</i>                         | 0.028               | 0.037               | 0.031               | 0.020               | 0.008 | 0.025              | 0.033              | 0.005 | 0.602    | 0.230   | 0.476 |
| <i>Christensenellaceae</i>                       | 0.229 <sup>t</sup>  | 0.051 <sup>t</sup>  | 0.086               | 0.150               | 0.048 | 0.130              | 0.128              | 0.028 | 0.083    | 0.962   | 0.758 |
| <i>Anaerolineaceae</i>                           | 0.063 <sup>a</sup>  | 0.179 <sup>b</sup>  | 0.141 <sup>b</sup>  | 0.222 <sup>b</sup>  | 0.028 | 0.168              | 0.134              | 0.020 | 0.007    | 0.297   | 0.938 |
| <i>Erysipelotrichaceae</i>                       | 0.068 <sup>a</sup>  | 0.020 <sup>b</sup>  | 0.015 <sup>b</sup>  | 0.014 <sup>b</sup>  | 0.008 | 0.029              | 0.030              | 0.004 | < 0.001  | 0.827   | 0.651 |
| <i>Fusobacteriaceae</i>                          | 0.024 <sup>t</sup>  | 0.014               | 0.012               | 0.006 <sup>t</sup>  | 0.005 | 0.016              | 0.012              | 0.003 | 0.094    | 0.468   | 0.919 |
| <i>Oligosphaeraceae</i>                          | 0.052               | 0.028               | 0.029               | 0.057               | 0.010 | 0.035              | 0.047              | 0.007 | 0.116    | 0.201   | 0.586 |
| <i>Porphyromonadaceae</i>                        | 0.017 <sup>t</sup>  | 0.009               | 0.008               | 0.007               | 0.003 | 0.011              | 0.009              | 0.002 | 0.058    | 0.558   | 0.647 |
| <i>Atopobiaceae</i>                              | 0.059 <sup>a</sup>  | 0.019 <sup>b</sup>  | 0.016 <sup>b</sup>  | 0.013 <sup>b</sup>  | 0.006 | 0.025              | 0.029              | 0.004 | < 0.001  | 0.215   | 0.332 |
| <i>Eggerthellaceae</i>                           | 0.024 <sup>a</sup>  | 0.014 <sup>b</sup>  | 0.011 <sup>b</sup>  | 0.008 <sup>b</sup>  | 0.002 | 0.013              | 0.015              | 0.001 | 0.001    | 0.259   | 0.463 |
| <i>Moraxellaceae</i>                             | 0.050               | 0.023               | 0.012               | 0.004               | 0.016 | 0.024              | 0.020              | 0.009 | 0.240    | 0.755   | 0.659 |
| <i>Pasteurellaceae</i>                           | 0.043               | 0.050               | 0.022               | 0.015               | 0.012 | 0.026              | 0.039              | 0.007 | 0.158    | 0.227   | 0.906 |
| <i>Bifidobacteriaceae</i>                        | 0.028               | 0.045               | 0.040               | 0.022               | 0.013 | 0.025 <sup>a</sup> | 0.043 <sup>b</sup> | 0.007 | 0.604    | 0.025   | 0.344 |

Means with different superscript (a, b, c, d) between dietary treatments and (A, B) between sampling time differ significantly ( $p \leq 0.05$ ) while, t; trend refers to  $p < 0.10$ . CON = control concentrate without microalgae; ALG20 = control concentrate with 20 g/Kg *Schizochytrium* sp.; ALG40 = control concentrate with 40 g/Kg *Schizochytrium* sp.; ALG60 = control concentrate with 60 g/Kg *Schizochytrium* sp. ‡ Effect: The dietary treatment (T), time (S), and the interaction between dietary treatment x time (TxS) effects were analyzed by ANOVA using a general linear model (GLM) for repeated measures and Post hoc analysis was performed when appropriate using Tukey multiple range test. †SEM: Standard error of the mean.

**Table S5.** Relative abundance of most abundant bacteria genera (> 0.06 %) and methanogenic archaea in the liquid of rumen of the four dietary treatments (CON, ALG20, ALG40, and ALG60) on two sampling points (20<sup>th</sup> and 40<sup>th</sup> experimental day).

| Genera                       | Treatment (T)       |                     |                     |                     |         | Sampling time (S)  |                    |         | Effect ‡ |         |       |
|------------------------------|---------------------|---------------------|---------------------|---------------------|---------|--------------------|--------------------|---------|----------|---------|-------|
|                              | CON                 | ALG20               | ALG40               | ALG60               | SEM†    | 20                 | 40                 | SEM†    | T        | S       | T x S |
| <i>Prevotella</i>            | 18.485 <sup>t</sup> | 21.607              | 22.245 <sup>t</sup> | 18.666              | 1.370   | 19.601             | 20.901             | 0.897   | 0.099    | 0.271   | 0.859 |
| <i>Treponema</i>             | 1.289               | 0.774               | 0.769               | 0.857               | 0.184   | 1.110 <sup>a</sup> | 0.735 <sup>b</sup> | 0.121   | 0.186    | 0.030   | 0.224 |
| <i>Ruminococcus</i>          | 2.816 <sup>a</sup>  | 1.443 <sup>b</sup>  | 1.059 <sup>b</sup>  | 1.609 <sup>b</sup>  | 0.377   | 2.061 <sup>a</sup> | 1.403 <sup>b</sup> | 0.214   | 0.026    | 0.008   | 0.357 |
| <i>Fretibacterium</i>        | 1.044 <sup>a</sup>  | 3.179 <sup>b</sup>  | 3.189 <sup>b</sup>  | 2.304 <sup>ab</sup> | 0.451   | 2.196              | 2.663              | 0.262   | 0.012    | 0.133   | 0.019 |
| <i>Anaerocolumna</i>         | 0.226               | 0.058               | 0.058               | 0.104               | 0.081   | 0.173              | 0.050              | 0.032   | 0.433    | 0.117   | 0.854 |
| <i>Ruminobacter</i>          | 0.837 <sup>a</sup>  | 1.144 <sup>ab</sup> | 2.061 <sup>b</sup>  | 0.677 <sup>a</sup>  | 0.344   | 1.292              | 1.067              | 0.231   | 0.049    | 0.498   | 0.181 |
| <i>Succiniclasticum</i>      | 1.611               | 2.145               | 1.857               | 1.573               | 0.173   | 1.905              | 1.688              | 0.114   | 0.113    | 0.152   | 0.466 |
| <i>Succinivibrio</i>         | 0.984               | 2.355               | 2.499               | 1.920               | 0.547   | 2.341              | 1.539              | 0.354   | 0.237    | 0.151   | 0.947 |
| <i>Fibrobacter</i>           | 1.642               | 1.792               | 1.441               | 1.186               | 0.269   | 2.151 <sup>a</sup> | 0.879 <sup>b</sup> | 0.150   | 0.439    | < 0.001 | 0.061 |
| <i>Anaeroplasma</i>          | 0.485               | 0.492               | 0.210               | 0.453               | 0.144   | 0.462              | 0.358              | 0.072   | 0.476    | 0.208   | 0.219 |
| <i>Butyrivibrio</i>          | 0.821               | 0.936 <sup>t</sup>  | 0.459 <sup>t</sup>  | 0.802               | 0.134   | 0.695              | 0.813              | 0.076   | 0.100    | 0.121   | 0.907 |
| <i>Flintibacter</i>          | 0.908 <sup>a</sup>  | 0.137 <sup>b</sup>  | 0.130 <sup>b</sup>  | 0.152 <sup>b</sup>  | 0.115   | 0.373              | 0.290              | 0.065   | < 0.001  | 0.188   | 0.067 |
| <i>Intestinimonas</i>        | 1.143 <sup>a</sup>  | 0.348 <sup>b</sup>  | 0.129 <sup>b</sup>  | 0.240 <sup>b</sup>  | 0.090   | 0.472              | 0.458              | 0.068   | < 0.001  | 0.873   | 0.785 |
| <i>Selenomonas</i>           | 1.074               | 0.944               | 0.920               | 0.855               | 0.208   | 1.036              | 0.860              | 0.129   | 0.898    | 0.399   | 0.616 |
| <i>Eubacterium</i>           | 0.512 <sup>a</sup>  | 0.332 <sup>b</sup>  | 0.307 <sup>b</sup>  | 0.331 <sup>b</sup>  | 0.052   | 0.375              | 0.365              | 0.030   | 0.046    | 0.742   | 0.112 |
| <i>Lachnoclostridium</i>     | 0.499 <sup>ab</sup> | 0.562 <sup>a</sup>  | 0.349 <sup>b</sup>  | 0.407 <sup>b</sup>  | 0.052   | 0.427              | 0.481              | 0.035   | 0.048    | 0.263   | 0.852 |
| <i>Acetatifactor</i>         | 0.072               | 0.060               | 0.052               | 0.061               | 0.021   | 0.071              | 0.051              | 0.012   | 0.920    | 0.331   | 0.844 |
| <i>Saccharofermentans</i>    | 0.326               | 0.295               | 0.175               | 0.286               | 0.055   | 0.372 <sup>a</sup> | 0.169 <sup>b</sup> | 0.032   | 0.272    | < 0.001 | 0.736 |
| <i>Sporobacter</i>           | 0.506 <sup>a</sup>  | 0.197 <sup>b</sup>  | 0.106 <sup>b</sup>  | 0.116 <sup>b</sup>  | 0.069   | 0.238              | 0.224              | 0.040   | 0.003    | 0.771   | 0.640 |
| <i>Desulfovibrio</i>         | 0.199 <sup>a</sup>  | 0.772 <sup>b</sup>  | 0.600 <sup>b</sup>  | 0.595 <sup>b</sup>  | 0.115   | 0.559              | 0.524              | 0.069   | 0.019    | 0.634   | 0.857 |
| <i>Kineothrix</i>            | 0.239               | 0.315               | 0.370               | 0.389               | 0.071   | 0.356              | 0.301              | 0.051   | 0.468    | 0.520   | 0.723 |
| <i>Pseudobutyrvibrio</i>     | 0.370               | 0.361               | 0.248               | 0.269               | 0.050   | 0.284              | 0.340              | 0.029   | 0.241    | 0.087   | 0.521 |
| <i>Succinimonas</i>          | 0.106               | 0.195               | 0.206               | 0.151               | 0.080   | 0.246 <sup>a</sup> | 0.083 <sup>b</sup> | 0.050   | 0.808    | 0.048   | 0.764 |
| <i>Ethanoligenens</i>        | 0.126               | 0.081               | 0.136               | 0.112               | 0.050   | 0.142              | 0.085              | 0.027   | 0.872    | 0.106   | 0.344 |
| <i>Oscillibacter</i>         | 0.531               | 0.893               | 0.795               | 0.990               | 0.171   | 0.682              | 0.923              | 0.104   | 0.293    | 0.083   | 0.367 |
| <i>Paraprevotella</i>        | 0.099               | 0.027               | 0.028               | 0.049               | 0.029   | 0.046              | 0.056              | 0.017   | 0.299    | 0.607   | 0.595 |
| <i>Neglecta</i>              | 0.064 <sup>a</sup>  | 0.007 <sup>b</sup>  | 0.004 <sup>b</sup>  | 0.004 <sup>b</sup>  | 0.012   | 0.031 <sup>a</sup> | 0.008 <sup>b</sup> | 0.007   | 0.007    | 0.034   | 0.064 |
| <i>Blautia</i>               | 0.302 <sup>a</sup>  | 0.214 <sup>b</sup>  | 0.156 <sup>b</sup>  | 0.169 <sup>b</sup>  | 0.027   | 0.191              | 0.230              | 0.018   | 0.007    | 0.108   | 0.674 |
| <i>Anaerovibrio</i>          | 0.343 <sup>a</sup>  | 0.703 <sup>b</sup>  | 0.517 <sup>ab</sup> | 0.233 <sup>a</sup>  | 0.114   | 0.491              | 0.408              | 0.062   | 0.049    | 0.269   | 0.968 |
| <i>Oribacterium</i>          | 0.182               | 0.225               | 0.129               | 0.165               | 0.037   | 0.158              | 0.192              | 0.030   | 0.357    | 0.489   | 0.379 |
| <i>Ruminococcaceae;null</i>  | 0.194               | 0.122               | 0.143               | 0.268               | 0.051   | 0.115 <sup>a</sup> | 0.248 <sup>b</sup> | 0.031   | 0.225    | 0.020   | 0.278 |
| <i>Elusimicrobium</i>        | 0.201               | 0.076 <sup>t</sup>  | 0.190               | 0.239 <sup>t</sup>  | 0.044   | 0.113 <sup>a</sup> | 0.237 <sup>b</sup> | 0.025   | 0.090    | 0.001   | 0.063 |
| <i>Bacteroides</i>           | 0.133               | 0.112               | 0.118               | 0.125               | 0.012   | 0.124              | 0.120              | 0.007   | 0.651    | 0.609   | 0.354 |
| <i>Anaerosporebacter</i>     | 0.061               | 0.061               | 0.076               | 0.052               | 0.016   | 0.081              | 0.044              | 0.012   | 0.779    | 0.069   | 0.649 |
| <i>Endomicrobium</i>         | 0.186 <sup>a</sup>  | 0.072 <sup>b</sup>  | 0.081 <sup>b</sup>  | 0.088 <sup>b</sup>  | 0.023   | 0.082              | 0.131              | 0.018   | 0.009    | 0.128   | 0.111 |
| <i>Aminipila</i>             | 0.142               | 0.099               | 0.093               | 0.096               | 0.018   | 0.089 <sup>a</sup> | 0.126 <sup>b</sup> | 0.010   | 0.219    | 0.015   | 0.857 |
| <i>Herbinix</i>              | 0.117               | 0.087               | 0.349               | 0.068               | 0.077   | 0.162              | 0.148              | 0.052   | 0.069    | 0.854   | 0.547 |
| <i>Stomatobaculum</i>        | 0.211 <sup>a</sup>  | 0.147 <sup>b</sup>  | 0.131 <sup>b</sup>  | 0.069 <sup>c</sup>  | 0.021   | 0.124              | 0.155              | 0.016   | 0.002    | 0.215   | 0.679 |
| <i>Hungateiclostridium</i>   | 0.093 <sup>a</sup>  | 0.033 <sup>b</sup>  | 0.033 <sup>b</sup>  | 0.065 <sup>ab</sup> | 0.014   | 0.062              | 0.050              | 0.009   | 0.018    | 0.358   | 0.438 |
| <i>Victivallis</i>           | 0.111               | 0.151               | 0.093               | 0.116               | 0.046   | 0.129              | 0.106              | 0.023   | 0.840    | 0.554   | 0.542 |
| <i>Methanobrevibacter</i>    | 0.102 <sup>t</sup>  | 0.126 <sup>t</sup>  | 0.045 <sup>t</sup>  | 0.054               | 0.024   | 0.074              | 0.089              | 0.016   | 0.083    | 0.472   | 0.973 |
| <i>Tyzzerella</i>            | 0.097               | 0.139               | 0.108               | 0.165               | 0.024   | 0.143              | 0.111              | 0.019   | 0.225    | 0.271   | 0.841 |
| <i>Fusicatenibacter</i>      | 0.060               | 0.087               | 0.060               | 0.049               | 0.015   | 0.064              | 0.065              | 0.012   | 0.352    | 0.512   | 0.966 |
| <i>Methanosphaera</i>        | 0.002               | 0.002               | 0.001               | 0.001               | < 0.001 | 0.001              | 0.002              | < 0.001 | 0.635    | 0.416   | 0.875 |
| <i>Methanomicrobium</i>      | 0.002 <sup>t</sup>  | 0.002 <sup>t</sup>  | 0.06                | 0.021 <sup>t</sup>  | 0.005   | 0.011              | 0.004              | 0.003   | 0.074    | 0.214   | 0.323 |
| <i>Methanimicrococcus</i>    | nd                  | nd                  | 0.001               | 0.002               | < 0.001 | 0.001              | 0.001              | < 0.001 | 0.016    | 0.366   | 0.232 |
| <i>Methanomassiliicoccus</i> | 0.001               | nd                  | 0.001               | nd                  | < 0.001 | 0.001              | 0.001              | < 0.001 | 0.805    | 0.725   | 0.343 |

Means with different superscript (a, b, c, d) between dietary treatments and (A, B) between sampling time differ significantly ( $p \leq 0.05$ ) while, t; trend refers to  $p < 0.10$ . CON = control concentrate without microalgae; ALG20 = control concentrate with 20 g/Kg *Schizochytrium* sp.; ALG40 = control concentrate with 40 g/Kg *Schizochytrium* sp.; ALG60 = control concentrate with 60 g/Kg *Schizochytrium* sp. ‡ Effect: The dietary treatment (T), time (S), and the interaction between dietary treatment x time (TxS) effects were

analyzed by ANOVA using a general linear model (GLM) for repeated measures and Post hoc analysis was performed when appropriate using Tukey multiple range test. †SEM: Standard error of the mean. Denote the yellow highlighted genera were used in discriminant analyses (Figure 1).

**Table S6.** Relative abundance of most abundant bacteria species and methanogenic archaea in the liquid of rumen of the four dietary treatments (CON, ALG20, ALG40, and ALG60) on two sampling points (20<sup>th</sup> and 40<sup>th</sup> experimental day).

| Species                                 | Treatment (T)       |                     |                     |                     |       | Sampling time (S)  |                    |       | Effect ‡ |         |       |
|-----------------------------------------|---------------------|---------------------|---------------------|---------------------|-------|--------------------|--------------------|-------|----------|---------|-------|
|                                         | CON                 | ALG20               | ALG40               | ALG60               | SEM†  | 20                 | 40                 | SEM†  | T        | S       | T x S |
| <i>Prevotella ruminicola</i>            | 9.789               | 11.299              | 11.560              | 9.244               | 1.162 | 10.366             | 10.580             | 0.700 | 0.440    | 0.802   | 0.801 |
| <i>Fretibacterium fastidiosum</i>       | 1.044 <sup>a</sup>  | 3.179 <sup>b</sup>  | 3.189 <sup>b</sup>  | 2.304 <sup>b</sup>  | 0.451 | 2.196              | 2.663              | 0.268 | 0.012    | 0.133   | 0.019 |
| <i>Prevotella brevis</i>                | 1.339 <sup>t</sup>  | 1.526 <sup>t</sup>  | 2.216               | 2.589 <sup>t</sup>  | 0.374 | 2.006              | 1.829              | 0.202 | 0.097    | 0.575   | 0.343 |
| <i>Prevotella oralis</i>                | 0.959               | 1.799               | 1.643               | 1.517               | 0.258 | 1.422              | 1.536              | 0.166 | 0.153    | 0.614   | 0.548 |
| <i>Ruminobacter amylophilus</i>         | 0.837 <sup>a</sup>  | 1.144 <sup>ab</sup> | 2.061 <sup>b</sup>  | 0.677 <sup>a</sup>  | 0.344 | 1.292              | 1.067              | 0.231 | 0.050    | 0.498   | 0.908 |
| <i>Succinoclasticum ruminis</i>         | 1.611 <sup>t</sup>  | 2.145 <sup>t</sup>  | 1.857               | 1.573 <sup>t</sup>  | 0.173 | 1.905              | 1.688              | 0.113 | 0.098    | 0.152   | 0.710 |
| <i>Succinivibrio dextrinosolvens</i>    | 0.984 <sup>a</sup>  | 2.355 <sup>b</sup>  | 2.499 <sup>b</sup>  | 1.920 <sup>ab</sup> | 0.547 | 2.341              | 1.539              | 0.358 | 0.042    | 0.151   | 0.947 |
| <i>Fibrobacter succinogenes</i>         | 1.620               | 1.692               | 1.432               | 1.186               | 0.270 | 2.096 <sup>a</sup> | 0.869 <sup>b</sup> | 0.150 | 0.566    | < 0.001 | 0.126 |
| <i>Treponema bryantii</i>               | 0.551 <sup>a</sup>  | 0.279 <sup>b</sup>  | 0.187 <sup>b</sup>  | 0.292 <sup>b</sup>  | 0.045 | 0.368 <sup>a</sup> | 0.283 <sup>s</sup> | 0.025 | < 0.001  | 0.047   | 0.075 |
| <i>Ruminococcus bromii</i>              | 1.837 <sup>a</sup>  | 0.787 <sup>b</sup>  | 0.574 <sup>b</sup>  | 0.734 <sup>b</sup>  | 0.304 | 1.240 <sup>a</sup> | 0.726 <sup>b</sup> | 0.172 | 0.037    | 0.020   | 0.751 |
| <i>Prevotella corporis</i>              | 0.516               | 0.367               | 0.437               | 0.502               | 0.266 | 0.607              | 0.303              | 0.155 | 0.977    | 0.186   | 0.433 |
| <i>Treponema saccharophilum</i>         | 0.312               | 0.293               | 0.360               | 0.249               | 0.115 | 0.400              | 0.207              | 0.078 | 0.921    | 0.077   | 0.403 |
| <i>Anaeroplasmia abactoclasticum</i>    | 0.199               | 0.329               | 0.119               | 0.384               | 0.112 | 0.315              | 0.200              | 0.058 | 0.356    | 0.120   | 0.337 |
| <i>Butyrivibrio proteoclasticus</i>     | 0.474               | 0.505               | 0.212               | 0.498               | 0.142 | 0.365              | 0.483              | 0.078 | 0.446    | 0.103   | 0.722 |
| <i>Prevotella copri</i>                 | 1.861               | 1.307               | 1.779               | 1.657               | 0.403 | 1.468              | 1.834              | 0.241 | 0.778    | 0.163   | 0.729 |
| <i>Flintibacter butyricus</i>           | 0.908 <sup>a</sup>  | 0.137 <sup>b</sup>  | 0.130 <sup>b</sup>  | 0.152 <sup>b</sup>  | 0.115 | 0.373              | 0.290              | 0.065 | < 0.001  | 0.188   | 0.067 |
| <i>Intestinimonas butyriciproducens</i> | 1.143 <sup>a</sup>  | 0.348 <sup>b</sup>  | 0.129 <sup>b</sup>  | 0.240 <sup>b</sup>  | 0.090 | 0.472              | 0.458              | 0.066 | < 0.001  | 0.873   | 0.785 |
| <i>Prevotella shahii</i>                | 0.805 <sup>ab</sup> | 1.573 <sup>a</sup>  | 0.464 <sup>b</sup>  | 0.220 <sup>b</sup>  | 0.297 | 0.873              | 0.658              | 0.167 | 0.028    | 0.269   | 0.069 |
| <i>Acetatifactor muris</i>              | 0.072               | 0.060               | 0.052               | 0.061               | 0.021 | 0.071              | 0.051              | 0.012 | 0.920    | 0.331   | 0.844 |
| <i>Saccharofermentans acetigenes</i>    | 0.326               | 0.295               | 0.175               | 0.286               | 0.055 | 0.372 <sup>a</sup> | 0.169 <sup>b</sup> | 0.033 | 0.275    | < 0.001 | 0.736 |
| <i>Sporobacter termitidis</i>           | 0.506 <sup>a</sup>  | 0.197 <sup>b</sup>  | 0.106 <sup>b</sup>  | 0.116 <sup>b</sup>  | 0.069 | 0.238              | 0.224              | 0.041 | 0.003    | 0.771   | 0.640 |
| <i>Kineothrix alysoides</i>             | 0.239               | 0.315               | 0.370               | 0.389               | 0.071 | 0.356              | 0.301              | 0.050 | 0.468    | 0.520   | 0.723 |
| <i>Pseudobutyrvibrio ruminis</i>        | 0.368               | 0.360               | 0.247               | 0.268               | 0.050 | 0.283              | 0.339              | 0.033 | 0.240    | 0.087   | 0.516 |
| <i>Succinimonas amylolytica</i>         | 0.106               | 0.195               | 0.206               | 0.151               | 0.080 | 0.246 <sup>a</sup> | 0.083 <sup>b</sup> | 0.050 | 0.808    | 0.048   | 0.764 |
| <i>Ethanoligenens harbinense</i>        | 0.126               | 0.081               | 0.136               | 0.112               | 0.050 | 0.142              | 0.085              | 0.027 | 0.872    | 0.106   | 0.344 |
| <i>Paraprevotella clara</i>             | 0.099               | 0.026               | 0.028               | 0.049               | 0.029 | 0.045              | 0.055              | 0.018 | 0.296    | 0.590   | 0.597 |
| <i>Treponema ruminis</i>                | 0.321               | 0.165               | 0.180               | 0.260               | 0.074 | 0.284              | 0.181              | 0.049 | 0.420    | 0.150   | 0.675 |
| <i>Desulfovibrio desulfuricans</i>      | 0.085 <sup>a</sup>  | 0.543 <sup>b</sup>  | 0.452 <sup>b</sup>  | 0.324 <sup>ab</sup> | 0.111 | 0.379              | 0.323              | 0.063 | 0.049    | 0.407   | 0.606 |
| <i>Eubacterium coprostanoligenes</i>    | 0.260 <sup>a</sup>  | 0.162 <sup>a</sup>  | 0.161 <sup>a</sup>  | 0.146 <sup>a</sup>  | 0.032 | 0.188              | 0.177              | 0.020 | 0.078    | 0.624   | 0.190 |
| <i>Ruminococcus flavefaciens</i>        | 0.271 <sup>a</sup>  | 0.158 <sup>ab</sup> | 0.097 <sup>b</sup>  | 0.268 <sup>a</sup>  | 0.040 | 0.190              | 0.208              | 0.023 | 0.016    | 0.494   | 0.463 |
| <i>Anaerovibrio lipolyticus</i>         | 0.343 <sup>a</sup>  | 0.703 <sup>b</sup>  | 0.517 <sup>ab</sup> | 0.233 <sup>a</sup>  | 0.114 | 0.491              | 0.408              | 0.062 | 0.049    | 0.269   | 0.968 |
| <i>Ruminococcus gauvreauii</i>          | 0.179 <sup>t</sup>  | 0.105               | 0.069 <sup>t</sup>  | 0.110               | 0.027 | 0.151 <sup>a</sup> | 0.080 <sup>b</sup> | 0.019 | 0.070    | 0.017   | 0.162 |
| <i>Oribacterium asaccharolyticum</i>    | 0.146               | 0.164               | 0.108               | 0.149               | 0.036 | 0.127              | 0.157              | 0.030 | 0.729    | 0.531   | 0.288 |
| <i>Oscillibacter valericigenes</i>      | 0.154               | 0.483               | 0.500               | 0.699               | 0.158 | 0.437              | 0.482              | 0.090 | 0.178    | 0.683   | 0.536 |
| <i>Elusimicrobium minutum</i>           | 0.201               | 0.076 <sup>t</sup>  | 0.190               | 0.239 <sup>t</sup>  | 0.044 | 0.116 <sup>a</sup> | 0.237 <sup>b</sup> | 0.026 | 0.090    | 0.001   | 0.063 |
| <i>Selenomonas ruminantium</i>          | 0.586               | 0.292               | 0.251               | 0.204               | 0.146 | 0.413              | 0.283              | 0.091 | 0.283    | 0.302   | 0.827 |
| <i>Prevotella micans</i>                | 0.278               | 0.467               | 0.267               | 0.069               | 0.131 | 0.227              | 0.314              | 0.101 | 0.241    | 0.589   | 0.851 |
| <i>Ruminococcus albus</i>               | 0.243 <sup>t</sup>  | 0.171               | 0.131 <sup>t</sup>  | 0.195               | 0.037 | 0.204 <sup>a</sup> | 0.167 <sup>b</sup> | 0.020 | 0.099    | 0.036   | 0.600 |
| <i>Anaerosporeobacter mobilis</i>       | 0.061               | 0.061               | 0.076               | 0.052               | 0.016 | 0.081              | 0.044              | 0.012 | 0.779    | 0.069   | 0.614 |
| <i>Prevotella marshii</i>               | 0.043 <sup>t</sup>  | 0.133 <sup>t</sup>  | 0.081               | 0.072               | 0.026 | 0.104              | 0.061              | 0.020 | 0.100    | 0.206   | 0.908 |
| <i>Eubacterium siraeum</i>              | 0.119               | 0.073               | 0.086               | 0.213               | 0.047 | 0.070 <sup>a</sup> | 0.176 <sup>b</sup> | 0.026 | 0.187    | 0.039   | 0.310 |
| <i>Clostridium clostridioforme</i>      | 0.093               | 0.157               | 0.113               | 0.058               | 0.030 | 0.078              | 0.138              | 0.022 | 0.183    | 0.109   | 0.238 |
| <i>Endomicrobium proavitum</i>          | 0.186 <sup>a</sup>  | 0.072 <sup>b</sup>  | 0.081 <sup>b</sup>  | 0.088 <sup>b</sup>  | 0.023 | 0.082              | 0.131              | 0.017 | 0.009    | 0.128   | 0.111 |
| <i>Prevotella amnii</i>                 | 0.032               | 0.177               | 0.096               | 0.404               | 0.119 | 0.199              | 0.155              | 0.087 | 0.176    | 0.772   | 0.578 |
| <i>Aminipila butyrica</i>               | 0.142               | 0.099               | 0.093               | 0.096               | 0.018 | 0.089 <sup>a</sup> | 0.126 <sup>b</sup> | 0.009 | 0.213    | 0.015   | 0.857 |
| <i>Prevotella oulorum</i>               | 0.216               | 0.163               | 0.530               | 0.210               | 0.213 | 0.211              | 0.349              | 0.120 | 0.608    | 0.125   | 0.572 |

|                                            |                    |                    |                     |                    |       |                    |                    |       |         |       |       |
|--------------------------------------------|--------------------|--------------------|---------------------|--------------------|-------|--------------------|--------------------|-------|---------|-------|-------|
| <i>Ruminococcus champanellensis</i>        | 0.210              | 0.173              | 0.135               | 0.257              | 0.048 | 0.217              | 0.171              | 0.026 | 0.356   | 0.054 | 0.501 |
| <i>Prevotella buccalis</i>                 | 0.200              | 0.249              | 0.150               | 0.188              | 0.053 | 0.176              | 0.218              | 0.036 | 0.636   | 0.353 | 0.606 |
| <i>Herbinix luporum</i>                    | 0.117 <sup>t</sup> | 0.086              | 0.343 <sup>t</sup>  | 0.067 <sup>t</sup> | 0.077 | 0.162              | 0.147              | 0.052 | 0.068   | 0.854 | 0.543 |
| <i>Oscillibacter ruminantium</i>           | 0.376              | 0.410              | 0.295               | 0.291              | 0.123 | 0.245 <sup>a</sup> | 0.441 <sup>b</sup> | 0.074 | 0.871   | 0.009 | 0.688 |
| <i>Prevotella oris</i>                     | 0.267              | 0.800              | 0.410               | 0.161              | 0.226 | 0.243              | 0.575              | 0.120 | 0.246   | 0.122 | 0.252 |
| <i>Stomatobaculum longum</i>               | 0.211 <sup>a</sup> | 0.147 <sup>b</sup> | 0.131 <sup>b</sup>  | 0.069 <sup>c</sup> | 0.021 | 0.124              | 0.155              | 0.016 | 0.002   | 0.215 | 0.679 |
| <i>Victivallis vadensis</i>                | 0.111              | 0.151              | 0.093               | 0.116              | 0.046 | 0.129              | 0.106              | 0.022 | 0.840   | 0.554 | 0.661 |
| <i>Desulfovibrio intestinalis</i>          | 0.041 <sup>a</sup> | 0.153 <sup>b</sup> | 0.099 <sup>ab</sup> | 0.215 <sup>b</sup> | 0.039 | 0.120              | 0.134              | 0.026 | 0.036   | 0.683 | 0.840 |
| <i>Prevotella paludivovensis</i>           | 0.086              | 0.074              | 0.092               | 0.048              | 0.017 | 0.063              | 0.087              | 0.010 | 0.306   | 0.064 | 0.030 |
| <i>Prevotella stercorea</i>                | 0.169              | 0.293              | 0.390               | 0.433              | 0.126 | 0.437              | 0.206              | 0.075 | 0.480   | 0.109 | 0.340 |
| <i>Selenomonas lacticifex</i>              | 0.015              | 0.028              | 0.028               | 0.038              | 0.010 | 0.032              | 0.023              | 0.005 | 0.440   | 0.196 | 0.608 |
| <i>Blautia luti</i>                        | 0.121 <sup>a</sup> | 0.059 <sup>b</sup> | 0.087 <sup>ab</sup> | 0.052 <sup>b</sup> | 0.016 | 0.079              | 0.078              | 0.012 | 0.034   | 0.963 | 0.089 |
| <i>Clostridium asparagiforme</i>           | 0.104              | 0.156              | 0.046               | 0.076              | 0.033 | 0.095              | 0.096              | 0.020 | 0.144   | 0.973 | 0.714 |
| <i>Euscatenibacter saccharivorans</i>      | 0.060              | 0.087              | 0.060               | 0.049              | 0.015 | 0.064              | 0.065              | 0.013 | 0.352   | 0.966 | 0.512 |
| <i>Butyrivibrio hungatei</i>               | 0.294              | 0.375              | 0.222               | 0.289              | 0.056 | 0.309              | 0.281              | 0.047 | 0.322   | 0.719 | 0.718 |
| <i>Selenomonas flueggei</i>                | 0.097              | 0.176              | 0.148               | 0.132              | 0.056 | 0.179              | 0.098              | 0.037 | 0.788   | 0.092 | 0.541 |
| <i>Anaerotaenia torta</i>                  | 0.080              | 0.051              | 0.035               | 0.058              | 0.017 | 0.070 <sup>a</sup> | 0.042 <sup>b</sup> | 0.009 | 0.356   | 0.046 | 0.294 |
| <i>Murimonas intestini</i>                 | 0.078              | 0.056              | 0.044               | 0.053              | 0.010 | 0.054              | 0.061              | 0.007 | 0.123   | 0.454 | 0.069 |
| <i>Prevotella colorans</i>                 | 0.133              | 0.071              | 0.084               | 0.066              | 0.042 | 0.096              | 0.081              | 0.024 | 0.676   | 0.622 | 0.809 |
| <i>Methanobrevibacter thaueri</i>          | 0.027              | 0.042              | 0.012               | 0.016              | 0.013 | 0.012              | 0.037              | 0.008 | 0.377   | 0.078 | 0.079 |
| <i>Butyrivibrio fibrisolvens</i>           | 0.048              | 0.055              | 0.018               | 0.014              | 0.015 | 0.021              | 0.047              | 0.009 | 0.161   | 0.065 | 0.869 |
| <i>Faecalicatena orotica</i>               | 0.077              | 0.020              | 0.012               | 0.009              | 0.007 | 0.028              | 0.031              | 0.005 | < 0.001 | 0.759 | 0.953 |
| <i>Hungateiclostridium alkalicellulosi</i> | 0.048 <sup>a</sup> | 0.004 <sup>b</sup> | 0.009 <sup>b</sup>  | 0.021 <sup>b</sup> | 0.009 | 0.019              | 0.022              | 0.006 | 0.016   | 0.784 | 0.981 |
| <i>Prevotella dentalis</i>                 | 0.123              | 0.073              | 0.437               | 0.074              | 0.152 | 0.096              | 0.257              | 0.075 | 0.310   | 0.315 | 0.180 |
| <i>Ruminococcus faecis</i>                 | 0.031              | 0.026              | 0.023               | 0.021              | 0.005 | 0.033 <sup>a</sup> | 0.018 <sup>b</sup> | 0.003 | 0.569   | 0.003 | 0.878 |
| <i>Anaerocolumna cellulolytica</i>         | 0.067              | 0.049              | 0.050               | 0.056              | 0.015 | 0.070              | 0.041              | 0.008 | 0.812   | 0.066 | 0.955 |
| <i>Ihubacter massiliensis</i>              | 0.060 <sup>a</sup> | 0.041 <sup>b</sup> | 0.030 <sup>b</sup>  | 0.032 <sup>b</sup> | 0.007 | 0.034 <sup>a</sup> | 0.048 <sup>b</sup> | 0.004 | 0.018   | 0.025 | 0.757 |
| <i>Eubacterium ruminantium</i>             | 0.075              | 0.094              | 0.088               | 0.103              | 0.025 | 0.088              | 0.092              | 0.015 | 0.887   | 0.797 | 0.078 |
| <i>Prevotella melaninogenica</i>           | 0.235              | 0.337              | 0.498               | 0.236              | 0.201 | 0.316              | 0.337              | 0.121 | 0.769   | 0.907 | 0.061 |
| <i>Coprococcus eutactus</i>                | 0.055              | 0.034              | 0.031               | 0.042              | 0.009 | 0.044              | 0.037              | 0.006 | 0.288   | 0.463 | 0.249 |
| <i>Prevotella bryantii</i>                 | 0.157              | 0.046              | 0.028               | 0.033              | 0.027 | 0.049              | 0.083              | 0.017 | 0.010   | 0.273 | 0.249 |
| <i>Ruminococcus lactaris</i>               | 0.032 <sup>a</sup> | 0.010 <sup>b</sup> | 0.006 <sup>b</sup>  | 0.006 <sup>b</sup> | 0.003 | 0.013              | 0.014              | 0.003 | < 0.001 | 0.770 | 0.981 |
| <i>Prevotella loeschei</i>                 | 0.331              | 0.034              | 0.186               | 0.140              | 0.114 | 0.102              | 0.243              | 0.080 | 0.355   | 0.317 | 0.883 |
| <i>Tyzzerella nexilis</i>                  | 0.081              | 0.078              | 0.035               | 0.090              | 0.017 | 0.069              | 0.073              | 0.012 | 0.141   | 0.845 | 0.885 |
| <i>Eubacterium hallii</i>                  | 0.055              | 0.044              | 0.029               | 0.040              | 0.011 | 0.042              | 0.042              | 0.006 | 0.462   | 0.965 | 0.365 |
| <i>Eubacterium oxidoreducens</i>           | 0.062 <sup>a</sup> | 0.008 <sup>b</sup> | 0.007 <sup>b</sup>  | 0.012 <sup>b</sup> | 0.012 | 0.027              | 0.017              | 0.007 | 0.013   | 0.183 | 0.275 |
| <i>Selenomonas diana</i>                   | 0.046              | 0.079              | 0.089               | 0.092              | 0.016 | 0.070              | 0.082              | 0.012 | 0.183   | 0.544 | 0.043 |
| <i>Selenomonas noxia</i>                   | 0.181              | 0.080              | 0.123               | 0.175              | 0.058 | 0.162              | 0.118              | 0.040 | 0.580   | 0.495 | 0.736 |
| <i>Clostridium colinum</i>                 | 0.016              | 0.062              | 0.072               | 0.076              | 0.016 | 0.074              | 0.039              | 0.011 | 0.062   | 0.051 | 0.381 |
| <i>Clostridium methylpentosum</i>          | 0.050              | 0.034              | 0.040               | 0.013              | 0.017 | 0.020              | 0.049              | 0.011 | 0.505   | 0.118 | 0.777 |
| <i>Lachnoclostridium pacaense</i>          | 0.032              | 0.041              | 0.041               | 0.065              | 0.009 | 0.050              | 0.039              | 0.007 | 0.113   | 0.353 | 0.458 |
| <i>Hungateiclostridium straminisolvans</i> | 0.015              | 0.010              | 0.004               | 0.007              | 0.004 | 0.010              | 0.008              | 0.002 | 0.296   | 0.179 | 0.379 |
| <i>Selenomonas sputigena</i>               | 0.097 <sup>t</sup> | 0.247 <sup>t</sup> | 0.247 <sup>t</sup>  | 0.152              | 0.046 | 0.131 <sup>a</sup> | 0.241 <sup>b</sup> | 0.034 | 0.092   | 0.045 | 0.541 |
| <i>Abyssivirga alkaniphila</i>             | 0.048 <sup>a</sup> | 0.024 <sup>b</sup> | 0.015 <sup>b</sup>  | 0.012 <sup>b</sup> | 0.004 | 0.026              | 0.023              | 0.003 | < 0.001 | 0.585 | 0.581 |
| <i>Clostridium scindens</i>                | 0.042 <sup>a</sup> | 0.017 <sup>b</sup> | 0.009 <sup>b</sup>  | 0.010 <sup>b</sup> | 0.005 | 0.020              | 0.019              | 0.003 | 0.001   | 0.588 | 0.688 |
| <i>Bacteroides stercoris</i>               | 0.017              | 0.014              | 0.015               | 0.012              | 0.002 | 0.015              | 0.014              | 0.001 | 0.473   | 0.322 | 0.378 |
| <i>Bacteroides vulgatus</i>                | 0.014              | 0.011              | 0.016               | 0.015              | 0.003 | 0.013              | 0.015              | 0.002 | 0.602   | 0.401 | 0.486 |
| <i>Pseudoflavonifractor phocaensis</i>     | 0.024              | 0.006              | 0.009               | 0.032              | 0.009 | 0.014              | 0.021              | 0.005 | 0.192   | 0.426 | 0.557 |
| <i>Prevotella denticola</i>                | 0.124              | 0.006              | 0.012               | 0.008              | 0.055 | 0.036              | 0.039              | 0.027 | 0.376   | 0.109 | 0.244 |
| <i>Prevotella saccharolytica</i>           | 0.019              | 0.060              | 0.048               | 0.027              | 0.017 | 0.037              | 0.040              | 0.009 | 0.321   | 0.863 | 0.597 |
| <i>Selenomonas bovis</i>                   | 0.042              | 0.031              | 0.025               | 0.028              | 0.013 | 0.034              | 0.030              | 0.009 | 0.774   | 0.769 | 0.571 |
| <i>Solobacterium moorei</i>                | 0.037 <sup>a</sup> | 0.010 <sup>b</sup> | 0.006 <sup>b</sup>  | 0.006 <sup>b</sup> | 0.006 | 0.016              | 0.013              | 0.004 | 0.004   | 0.766 | 0.507 |
| <i>Faecalibacterium prausnitzii</i>        | 0.025              | 0.014              | 0.019               | 0.016              | 0.004 | 0.020              | 0.017              | 0.003 | 0.279   | 0.326 | 0.100 |
| <i>Prevotella dentasini</i>                | 0.023              | 0.005              | 0.012               | 0.005              | 0.006 | 0.014              | 0.008              | 0.003 | 0.178   | 0.339 | 0.737 |
| <i>Clostridium lavalense</i>               | 0.018              | 0.022              | 0.016               | 0.054              | 0.014 | 0.028              | 0.026              | 0.007 | 0.204   | 0.828 | 0.740 |

|                                          |                     |                     |                      |        |        |                    |        |        |        |       |       |
|------------------------------------------|---------------------|---------------------|----------------------|--------|--------|--------------------|--------|--------|--------|-------|-------|
| <i>Eubacterium rectale</i>               | 0,015               | 0,012               | 0,016                | 0,020  | 0,005  | 0,009 <sup>a</sup> | 0,022b | 0,002  | 0,672  | 0,006 | 0.637 |
| <i>Lachnoanaerobaculum orale</i>         | 0,006 <sup>a</sup>  | 0,014               | 0,024                | 0,064b | 0,014  | 0,035              | 0,019  | 0,010  | 0,051  | 0,326 | 0.890 |
| <i>Mitsuokella multacida</i>             | 0,066               | 0,078               | 0,073                | 0,060  | 0,014  | 0,081              | 0,058  | 0,008  | 0,846  | 0,132 | 0,876 |
| <i>Clostridium aminophilum</i>           | 0,048               | 0,066               | 0,043                | 0,060  | 0,009  | 0,044 <sup>a</sup> | 0,065b | 0,006  | 0,312  | 0,007 | 0.936 |
| <i>Ruminococcus callidus</i>             | 0,014               | 0,011               | 0,021                | 0,018  | 0,008  | 0,013              | 0,019  | 0,004  | 0,811  | 0,165 | 0,933 |
| <i>Prevotella maculosa</i>               | 0,058               | 0,166               | 0,326                | 0,140  | 0,152  | 0,082              | 0,263  | 0,081  | 0,657  | 0,236 | 0,458 |
| <i>Ruminiclostridium cellulolyticum</i>  | 0,021               | 0,016               | 0,007                | 0,009  | 0,005  | 0,012              | 0,015  | 0,004  | 0,176  | 0,727 | 0,894 |
| <i>Clostridium leptum</i>                | 0,018               | 0,005               | 0,006                | 0,028  | 0,012  | 0,012              | 0,017  | 0,006  | 0,453  | 0,495 | 0,304 |
| <i>Clostridium saudiense</i>             | 0,003               | 0,003               | 0,003                | 0,003  | 0,001  | 0,004 <sup>a</sup> | 0,001b | 0,001  | 0,976  | 0,001 | 0.721 |
| <i>Collinsella aerofaciens</i>           | 0,006               | 0,002               | 0,003                | 0,004  | 0,001  | 0,005              | 0,003  | 0,001  | 0,167  | 0,407 | 0,040 |
| <i>Clostridium populeti</i>              | 0,021               | 0,025               | 0,014                | 0,013  | 0,007  | 0,018              | 0,018  | 0,004  | 0,566  | 0,959 | 0,326 |
| <i>Clostridium xylanolyticum</i>         | 0,027               | 0,026               | 0,007                | 0,022  | 0,008  | 0,030 <sup>a</sup> | 0,011b | 0,004  | 0,330  | 0,001 | 0.104 |
| <i>Methanobrevibacter olleyae</i>        | 0,006 <sup>a</sup>  | 0,001b              | 0,000b               | 0,000b | <0,001 | 0,002              | 0,002  | <0,001 | <0,001 | 0,295 | 0.084 |
| <i>Methanobrevibacter millerae</i>       | 0,066               | 0,075               | 0,027                | 0,033  | 0,021  | 0,056              | 0,044  | 0,013  | 0,336  | 0,481 | 0,053 |
| <i>Methanomicrobium mobile</i>           | 0,002 <sup>a</sup>  | 0,002 <sup>a</sup>  | 0,006 <sup>a</sup> b | 0,021b | 0,005  | 0,011              | 0,004  | 0,003  | 0,074  | 0,214 | 0,323 |
| <i>Ruminococcus gnavus</i>               | 0,005               | 0,007               | 0,004                | 0,011  | 0,002  | 0,008              | 0,006  | 0,001  | 0,160  | 0,377 | 0,175 |
| <i>Ruminococcus torques</i>              | 0,003               | 0,002               | 0,002                | 0,001  | 0,001  | 0,002              | 0,002  | 0,001  | 0,666  | 0,703 | 0,215 |
| <i>Streptococcus pharyngis</i>           | 0,003               | 0,001               | 0,001                | <0,001 | 0,001  | 0,002              | 0,001  | <0,001 | 0,127  | 0,297 | 0,288 |
| <i>Methanobrevibacter boviskoreani</i>   | 0,003               | 0,004               | 0,004                | 0,003  | 0,002  | 0,002              | 0,005  | 0,001  | 0,957  | 0,216 | 0,890 |
| <i>Methanimicrococcus blatticola</i>     | <0,001 <sup>a</sup> | <0,001 <sup>a</sup> | 0,001 <sup>a</sup> b | 0,002b | <0,001 | 0,001              | 0,001  | <0,001 | 0,016  | 0,366 | 0,232 |
| <i>Methanobrevibacter ruminantium</i>    | -                   | -                   | -                    | -      | -      | -                  | -      | -      | -      | -     | -     |
| <i>Methanobrevibacter smithii</i>        | -                   | -                   | -                    | -      | -      | -                  | -      | -      | -      | -     | -     |
| <i>Methanomassiliicoccus luminyensis</i> | 0,001               | 0,000               | 0,001                | 0,000  | <0,001 | 0,000              | 0,001  | <0,001 | 0,805  | 0,725 | 0,343 |
| <i>Methanobrevibacter boviskoreani</i>   | 0,003               | 0,004               | 0,004                | 0,003  | 0,002  | 0,002              | 0,005  | 0,001  | 0,957  | 0,216 | 0,890 |
| <i>Methanospaera stadtmannae</i>         | 0,002               | 0,002               | 0,001                | 0,001  | 0,001  | 0,001              | 0,002  | <0,001 | 0,635  | 0,416 | 0,762 |

Means with different superscript (a, b, c, d) between dietary treatments and (A, B) between sampling time differ significantly ( $p \leq 0.05$ ) while, t; trend refers to  $p < 0.10$ . CON = control concentrate without microalgae; ALG20 = control concentrate with 20 g/Kg *Schizochytrium* sp.; ALG40 = control concentrate with 40 g/Kg *Schizochytrium* sp.; ALG60 = control concentrate with 60 g/Kg *Schizochytrium* sp. ‡ Effect: The dietary treatment (T), time (S), and the interaction between dietary treatment x time (TxS) effects were analyzed by ANOVA using a general linear model (GLM) for repeated measures and Post hoc analysis was performed when appropriate using Tukey multiple range test. †SEM: Standard error of the mean Yellow highlighted; species used as proteolytic (Figure 4A,B). Blue highlighted; species used as amylolytic (Figure 5A,B). Green highlighted; species used as cellulolytic (Figure 6A,B). Grey highlighted; species used as other important bacteria (Figure 7). Purple highlighted; species used as methanogenic (Figure 8).

**Table S7.** Ingredients of concentrate (g/Kg), average feed consumption (g/goat/day), intake of nutrients and fatty acids (g/goat) of the four diets.

| Ingredients (g/Kg)                 | Concentrate |       |       |       |
|------------------------------------|-------------|-------|-------|-------|
| Maize grain                        | 367         |       |       |       |
| Barley grain                       | 200         |       |       |       |
| Wheat middlings                    | 210         |       |       |       |
| Sunflower meal                     | 80          |       |       |       |
| Soybean meal                       | 100         |       |       |       |
| Calcium phosphate                  | 15          |       |       |       |
| Calcium carbonate                  | 5           |       |       |       |
| Salt                               | 3           |       |       |       |
| Mineral and vitamin                | 20          |       |       |       |
| Daily feed consumption (g/goat)    | CON         | ALG20 | ALG40 | ALG60 |
| Alfalfa hay                        | 1000        | 1000  | 1000  | 1000  |
| Concentrate                        | 1000        | 1000  | 1000  | 670*  |
| Daily intake of nutrients (g/goat) |             |       |       |       |
| Dry matter                         | 1849        | 1854  | 1854  | 1547  |
| Crude protein                      | 260         | 261   | 261   | 219   |
| Ether extract                      | 56          | 70    | 76    | 66    |
| Crude fiber                        | 369         | 371   | 371   | 357   |
| NDF                                | 660         | 655   | 652   | 621   |



| ADF                                    | 442   | 437   | 438   | 424   |
|----------------------------------------|-------|-------|-------|-------|
| <i>Fatty acids intake (g/goat/day)</i> |       |       |       |       |
| C <sub>14:0</sub>                      | 0.34  | 1.10  | 2.06  | 3.08  |
| C <sub>16:0</sub>                      | 10.26 | 12.77 | 15.88 | 14.01 |
| C <sub>18:0</sub>                      | 2.43  | 2.58  | 2.46  | 2.08  |
| <sup>Cis-9</sup> C <sub>18:1</sub>     | 17.03 | 18.49 | 16.75 | 13.05 |
| C <sub>18:2 n-6</sub>                  | 21.58 | 24.23 | 23.03 | 18.57 |
| C <sub>18:3 n-3</sub>                  | 2.78  | 3.47  | 3.38  | 2.90  |
| C <sub>22:5 n-6</sub>                  | -     | 1.65  | 3.34  | 3.28  |
| C <sub>22:6 n-3</sub>                  | -     | 4.16  | 8.44  | 8.20  |

\*denotes that concentrate were decreased in ALG60 by 33%. CON = control concentrate without microalgae (*Schizochytrium sp.*); ALG20 = CON with 20 g/Kg *Schizochytrium sp.*; ALG40 = CON with 40 g/Kg.; ALG60 = CON with 60 g/Kg *Schizochytrium sp.*; NDF = Neutral detergent fiber; ADF = Acid detergent fiber.

**Table S8.** Effect of supplementing microalgae *Schizochytrium* sp on pH, ammonia concentration,  $\alpha$ -amylase, protease, cellulase, and xylanase activity in the liquid of rumen of the four dietary treatments (CON, ALG20, ALG40, and ALG60) on two sampling points (20<sup>th</sup> and 40<sup>th</sup> experimental day).

|                                                | Treatment (T)      |                     |                    |                    |       | Sampling time (S) |                    |       | Effect† |       |       |
|------------------------------------------------|--------------------|---------------------|--------------------|--------------------|-------|-------------------|--------------------|-------|---------|-------|-------|
|                                                | CON                | ALG20               | ALG40              | ALG60              | SEM†  | 20                | 40                 | SEM†  | T       | S     | T * S |
| Protease activity (U/mL) <sup>a</sup>          | 0.106              | 0.142               | 0.144              | 0.137              | 0.019 | 0.114             | 0.150              | 0.015 | 0.456   | 0.234 | 0.991 |
| $\alpha$ -Amylase activity (U/mL) <sup>b</sup> | 2.738 <sup>a</sup> | 2.784 <sup>a</sup>  | 3.483 <sup>b</sup> | 2.822 <sup>a</sup> | 0.207 | 2.837             | 3.077              | 0.148 | 0.048   | 0.313 | 0.641 |
| Cellulose activity (U/mL/h) <sup>c</sup>       | 11.29 <sup>a</sup> | 11.07 <sup>ab</sup> | 10.28 <sup>b</sup> | 9.76 <sup>b</sup>  | 0.450 | 9.95 <sup>a</sup> | 11.25 <sup>b</sup> | 0.287 | 0.050   | 0.008 | 0.248 |
| Xylanase (U/mL/h) <sup>d</sup>                 | 8.09               | 8.32                | 8.75               | 7.72               | 0.400 | 8.13              | 8.31               | 0.247 | 0.356   | 0.555 | 0.599 |
| NH <sub>3</sub> -N mg/L                        | 123.7 <sup>a</sup> | 124.1 <sup>a</sup>  | 93.3 <sup>b</sup>  | 114.0 <sup>a</sup> | 6.137 | 105.1A            | 122.5B             | 4.201 | 0.008   | 0.008 | 0.018 |
| pH                                             | 7.30               | 7.36                | 7.12               | 7.24               | 0.057 | 7.24              | 7.27               | 0.044 | 0.120   | 0.703 | 0.868 |

Means with different superscript (a, b, c, d) between dietary treatments and (A, B) between sampling time differ significantly ( $p \leq 0.05$ ). CON = control concentrate without microalgae; ALG20 = control concentrate with 20 g/Kg *Schizochytrium* sp.; ALG40 = control concentrate with 40 g/Kg *Schizochytrium* sp.; ALG60 = control concentrate with 60 g/Kg *Schizochytrium* sp. † Effect: The dietary treatment (T), time (S), and the interaction between dietary treatment x time (TxS) effects were analyzed by ANOVA using a general linear model (GLM) for repeated measures and Post hoc analysis was performed when appropriate using Tukey multiple range test. †SEM: Standard error of the mean a Units/mL =  $[(\mu\text{mol of protein equivalent to ABS}) \times (\text{total volume of reaction in mL}) \times (\text{dilution factor})] / [(\text{incubation time in minutes}) \times (\text{volume of colorimetric determination in mL}) \times (\text{volume of rumen sample in mL})]$ . b One unit of  $\alpha$ -amylase activity will liberate 1.0 mg of maltose from starch in 10 min at pH 6.9 at 39 °C. c One unit of cellulase activity based on endo-cellulase (*A. niger*) clearance activity in 24h incubation at 50 °C. d One unit of xylanase activity based on endo-1-4-beta-Xylanase M1 (*T. viride*) clearance activity in 24h incubation at 37 °C.

**Table S9.** The mean individual fatty acids (FA) (% of total FA) of goats' rumen fluid of the four dietary treatments (CON, ALG20, ALG40, and ALG60) on two sampling points (20<sup>th</sup> and 40<sup>th</sup> experimental day).

|                              | Treatment (T)      |                    |                    |                    |       | Sampling time (S)  |                    |       | Effect † |        |        |
|------------------------------|--------------------|--------------------|--------------------|--------------------|-------|--------------------|--------------------|-------|----------|--------|--------|
|                              | CON                | ALG20              | ALG40              | ALG60              | SEM†  | 20                 | 40                 | SEM†  | T        | S      | TxS    |
| C <sub>14:0</sub>            | 1.61 <sup>a</sup>  | 2.86 <sup>b</sup>  | 3.74 <sup>c</sup>  | 4.37 <sup>d</sup>  | 0.142 | 3.16               | 3.13               | 0.101 | <0.001   | 0.857  | 0.367  |
| C <sub>14:1</sub>            | 1.06               | 1.51               | 1.11               | 1.24               | 0.117 | 1.21               | 1.24               | 0.087 | 0.056    | 0.732  | 0.002  |
| C <sub>15:0</sub>            | 1.06               | 1.36               | 0.92               | 0.96               | 0.100 | 0.99               | 1.16               | 0.060 | 0.022    | 0.093  | 0.019  |
| C <sub>16:0</sub>            | 26.64 <sup>a</sup> | 29.36 <sup>b</sup> | 25.27 <sup>a</sup> | 25.22 <sup>a</sup> | 0.545 | 25.26 <sup>A</sup> | 27.98 <sup>B</sup> | 0.345 | <0.001   | <0.001 | 0.008  |
| C <sub>16:1</sub>            | 0.209              | 0.512              | 0.324              | 0.612              | 0.113 | 0.305 <sup>A</sup> | 0.524 <sup>B</sup> | 0.069 | 0.082    | 0.021  | 0.398  |
| C <sub>18:0</sub>            | 44.27 <sup>a</sup> | 6.62 <sup>b</sup>  | 3.67 <sup>b</sup>  | 3.39 <sup>b</sup>  | 1.483 | 14.75              | 14.23              | 0.821 | <0.001   | 0.509  | 0.113  |
| trans C <sub>18:1</sub>      | 1.48 <sup>a</sup>  | 3.06 <sup>b</sup>  | 2.08 <sup>a</sup>  | 1.85 <sup>a</sup>  | 0.283 | 2.25               | 1.94               | 0.159 | 0.005    | 0.295  | 0.159  |
| trans-11 C <sub>18:1</sub>   | 4.80 <sup>a</sup>  | 27.47 <sup>b</sup> | 25.84 <sup>b</sup> | 23.14 <sup>b</sup> | 1.212 | 21.96 <sup>A</sup> | 18.66 <sup>B</sup> | 0.702 | <0.001   | <0.001 | <0.001 |
| trans-10 C <sub>18:1</sub>   | 0.00 <sup>a</sup>  | 2.18 <sup>b</sup>  | 1.64 <sup>b</sup>  | 1.59 <sup>b</sup>  | 0.138 | 1.50 <sup>A</sup>  | 1.21 <sup>B</sup>  | 0.098 | <0.001   | <0.001 | 0.241  |
| cis-9 C <sub>18:1</sub>      | 9.86 <sup>a</sup>  | 12.32 <sup>b</sup> | 9.65 <sup>a</sup>  | 8.34 <sup>a</sup>  | 0.552 | 9.19 <sup>A</sup>  | 10.91 <sup>B</sup> | 0.345 | 0.001    | <0.001 | 0.241  |
| C <sub>18:2 n-6 cis</sub>    | 6.23 <sup>a</sup>  | 4.53 <sup>ab</sup> | 3.77 <sup>b</sup>  | 3.18 <sup>b</sup>  | 0.509 | 4.07               | 4.79               | 0.321 | 0.003    | 0.104  | 0.262  |
| C <sub>18:3 n-3</sub>        | 1.27               | 1.01               | 0.98               | 1.04               | 0.268 | 0.816              | 1.34               | 0.191 | 0.866    | 0.058  | 0.305  |
| C <sub>18:2 conjugated</sub> | 1.07               | 1.43               | 1.36               | 1.25               | 0.181 | 0.969 <sup>A</sup> | 1.59 <sup>B</sup>  | 0.102 | 0.521    | 0.001  | 0.278  |
| C <sub>22:5 n-6</sub>        | 0.00 <sup>a</sup>  | 2.32 <sup>b</sup>  | 6.81 <sup>c</sup>  | 8.33 <sup>d</sup>  | 0.248 | 4.64 <sup>A</sup>  | 4.09 <sup>B</sup>  | 0.191 | <0.001   | 0.034  | 0.010  |
| C <sub>22:6 n-3</sub>        | 0.00 <sup>a</sup>  | 3.08 <sup>b</sup>  | 12.72 <sup>c</sup> | 15.32 <sup>d</sup> | 0.547 | 8.70 <sup>A</sup>  | 6.86 <sup>B</sup>  | 0.359 | <0.001   | 0.003  | 0.030  |

Means with different superscript (a, b, c, d) between dietary treatments and (A, B) between sampling time differ significantly ( $p \leq 0.05$ ). CON = control concentrate without microalgae; ALG20 = control concentrate with 20 g/Kg *Schizochytrium* sp.; ALG40 = control concentrate with 40 g/Kg *Schizochytrium* sp.; ALG60 = control concentrate with 60 g/Kg *Schizochytrium* sp. † Effect: The dietary treatment (T), time (S), and the interaction between dietary treatment x time (TxS) effects were analyzed by ANOVA using a general linear model (GLM) for repeated measures and Post hoc analysis was performed when appropriate using Tukey multiple range test. †SEM: Standard error of the mean.

**Table S10.** The mean individual fatty acids (FA) (% of total FA), FA groups, SFA/UFA and  $\omega 6/\omega 3$  ratios and  $\Delta$ -9 desaturase indexes of milk from goats fed diets with different levels (g/kg concentrate) of microalgae *Schizochytrium* sp. (CON, ALG20, ALG40 and ALG60) on two sampling points (20<sup>th</sup> and 40<sup>th</sup> experimental day).

|                                                                | Treatment (T)      |                     |                    |                     |       | Sampling time (S)  |                    |       | Effect ‡ |         |       |
|----------------------------------------------------------------|--------------------|---------------------|--------------------|---------------------|-------|--------------------|--------------------|-------|----------|---------|-------|
|                                                                | CON                | ALG20               | ALG40              | ALG60               | SEM†  | 20                 | 40                 | SEM†  | T        | S       | TxS   |
| C <sub>4:0</sub>                                               | 2.26               | 2.43                | 2.44               | 2.15                | 0.131 | 2.09 <sup>A</sup>  | 2.54 <sup>B</sup>  | 0.072 | 0.401    | 0.001   | 0.008 |
| C <sub>6:0</sub>                                               | 2.73               | 2.77                | 2.89               | 2.80                | 0.120 | 2.66 <sup>A</sup>  | 2.93 <sup>B</sup>  | 0.073 | 0.807    | 0.005   | 0.374 |
| C <sub>8:0</sub>                                               | 3.31               | 3.28                | 3.61               | 3.72                | 0.180 | 3.40               | 3.57               | 0.112 | 0.273    | 0.232   | 0.344 |
| C <sub>10:0</sub>                                              | 10.77              | 10.54               | 11.43              | 12.19               | 0.700 | 10.73              | 11.73              | 0.419 | 0.39     | 0.061   | 0.371 |
| C <sub>12:0</sub>                                              | 4.49               | 4.16                | 4.75               | 5.07                | 0.400 | 4.35               | 4.88               | 0.244 | 0.452    | 0.071   | 0.572 |
| C <sub>14:0</sub>                                              | 9.92 <sup>a</sup>  | 9.99 <sup>a</sup>   | 12.79 <sup>b</sup> | 11.28 <sup>ab</sup> | 0.583 | 10.61              | 11.38              | 0.400 | 0.011    | 0.211   | 0.257 |
| C <sub>14:1</sub>                                              | 0.30 <sup>a</sup>  | 0.28 <sup>ab</sup>  | 0.24 <sup>b</sup>  | 0.30 <sup>ab</sup>  | 0.025 | 0.32 <sup>A</sup>  | 0.24 <sup>B</sup>  | 0.012 | 0.265    | 0.001   | 0.001 |
| C <sub>15:0</sub>                                              | 0.90 <sup>ab</sup> | 0.97 <sup>a</sup>   | 0.78 <sup>b</sup>  | 0.86 <sup>ab</sup>  | 0.043 | 0.92 <sup>A</sup>  | 0.83 <sup>B</sup>  | 0.026 | 0.046    | 0.008   | 0.139 |
| C <sub>15:1</sub>                                              | 0.20 <sup>a</sup>  | 0.20 <sup>ab</sup>  | 0.17 <sup>b</sup>  | 0.19 <sup>ab</sup>  | 0.015 | 0.22 <sup>A</sup>  | 0.16 <sup>B</sup>  | 0.011 | 0.503    | 0.001   | 0.591 |
| C <sub>16:0</sub>                                              | 24.13 <sup>a</sup> | 27.55 <sup>b</sup>  | 27.67 <sup>b</sup> | 28.12 <sup>b</sup>  | 1.164 | 26.10 <sup>A</sup> | 27.64 <sup>B</sup> | 0.664 | 0.071    | 0.044   | 0.511 |
| C <sub>16:1</sub>                                              | 0.96 <sup>a</sup>  | 0.77 <sup>ab</sup>  | 0.71 <sup>b</sup>  | 0.66 <sup>b</sup>   | 0.081 | 0.68 <sup>A</sup>  | 0.87 <sup>B</sup>  | 0.046 | 0.077    | 0.003   | 0.314 |
| C <sub>17:0</sub>                                              | 0.61 <sup>a</sup>  | 0.37 <sup>b</sup>   | 0.28 <sup>b</sup>  | 0.28 <sup>b</sup>   | 0.066 | 0.39 <sup>A</sup>  | 0.39 <sup>A</sup>  | 0.040 | 0.006    | 0.973   | 0.723 |
| C <sub>18:0</sub>                                              | 9.66 <sup>a</sup>  | 2.97 <sup>b</sup>   | 1.85 <sup>b</sup>  | 1.85 <sup>b</sup>   | 0.660 | 4.33               | 3.84               | 0.350 | < 0.001  | 0.170   | 0.653 |
| trans C <sub>18:1</sub> ††                                     | 0.71 <sup>a</sup>  | 1.25 <sup>b</sup>   | 1.01 <sup>ab</sup> | 0.95 <sup>ab</sup>  | 0.103 | 1.09 <sup>B</sup>  | 0.87 <sup>A</sup>  | 0.062 | 0.009    | 0.050   | 0.627 |
| trans-10 C <sub>18:1</sub>                                     | 0.61 <sup>a</sup>  | 0.96 <sup>b</sup>   | 0.82 <sup>b</sup>  | 0.82 <sup>b</sup>   | 0.064 | 0.83               | 0.77               | 0.038 | 0.005    | 0.191   | 0.227 |
| trans-11 C <sub>18:1</sub>                                     | 1.59 <sup>a</sup>  | 10.36 <sup>b</sup>  | 9.25 <sup>b</sup>  | 9.80 <sup>b</sup>   | 0.700 | 9.01 <sup>A</sup>  | 6.49 <sup>B</sup>  | 0.436 | < 0.001  | < 0.001 | 0.009 |
| cis-9 C <sub>18:1</sub>                                        | 21.86 <sup>a</sup> | 11.57 <sup>b</sup>  | 8.93 <sup>b</sup>  | 8.11 <sup>b</sup>   | 1.280 | 12.65              | 12.58              | 0.734 | < 0.001  | 0.942   | 0.437 |
| C <sub>18:2</sub> n-6 t                                        | 0.29               | 0.37                | 0.34               | 0.28                | 0.031 | 0.29 <sup>A</sup>  | 0.35 <sup>B</sup>  | 0.019 | 0.171    | 0.017   | 0.389 |
| C <sub>18:2</sub> n-6 c                                        | 2.84 <sup>a</sup>  | 2.79 <sup>a</sup>   | 1.93 <sup>b</sup>  | 1.60 <sup>b</sup>   | 0.165 | 2.21               | 2.37               | 0.095 | < 0.001  | 0.124   | 0.170 |
| C <sub>18:3</sub> n-3                                          | 0.24               | 0.26                | 0.25               | 0.26                | 0.033 | 0.21 <sup>A</sup>  | 0.30 <sup>B</sup>  | 0.017 | 0.919    | < 0.001 | 0.220 |
| cis-9, trans-11 C <sub>18:2</sub>                              | 0.96 <sup>a</sup>  | 3.87 <sup>b</sup>   | 4.36 <sup>b</sup>  | 4.21 <sup>b</sup>   | 0.360 | 3.82 <sup>A</sup>  | 2.87 <sup>B</sup>  | 0.188 | < 0.001  | < 0.001 | 0.009 |
| trans-10, cis-12 C <sub>18:2</sub>                             | 0.03 <sup>a</sup>  | 0.17 <sup>b</sup>   | 0.18 <sup>b</sup>  | 0.18 <sup>b</sup>   | 0.022 | 0.13               | 0.15               | 0.015 | < 0.001  | 0.527   | 0.045 |
| C <sub>20:3</sub> n-3                                          | 0.23 <sup>a</sup>  | 0.33 <sup>b</sup>   | 0.52 <sup>c</sup>  | 0.55 <sup>c</sup>   | 0.030 | 0.41 <sup>A</sup>  | 0.40 <sup>A</sup>  | 0.017 | < 0.001  | 0.338   | 0.490 |
| C <sub>22:5</sub> n-6                                          | 0.00 <sup>a</sup>  | 0.25 <sup>b</sup>   | 0.53 <sup>c</sup>  | 0.74 <sup>d</sup>   | 0.034 | 0.44 <sup>A</sup>  | 0.32 <sup>B</sup>  | 0.020 | < 0.001  | < 0.001 | 0.001 |
| C <sub>22:6</sub> n-3                                          | 0.00 <sup>a</sup>  | 0.70 <sup>b</sup>   | 1.26 <sup>c</sup>  | 1.55 <sup>d</sup>   | 0.075 | 0.96 <sup>A</sup>  | 0.80 <sup>B</sup>  | 0.043 | < 0.001  | 0.003   | 0.001 |
| SCFA                                                           | 19.10              | 19.09               | 20.37              | 20.90               | 0.900 | 18.93 <sup>A</sup> | 20.80 <sup>B</sup> | 0.565 | 0.410    | 0.020   | 0.407 |
| MCFA                                                           | 39.46 <sup>a</sup> | 42.69 <sup>ab</sup> | 45.98 <sup>b</sup> | 45.35 <sup>b</sup>  | 1.705 | 42.01 <sup>A</sup> | 44.74 <sup>B</sup> | 0.994 | 0.054    | 0.018   | 0.184 |
| LCFA                                                           | 10.39 <sup>a</sup> | 3.70 <sup>b</sup>   | 2.60 <sup>b</sup>  | 2.75 <sup>b</sup>   | 0.705 | 5.20               | 4.52               | 0.380 | < 0.001  | 0.116   | 0.729 |
| MUFA                                                           | 26.46 <sup>a</sup> | 25.75 <sup>ab</sup> | 21.64 <sup>b</sup> | 21.58 <sup>b</sup>  | 1.445 | 25.33 <sup>A</sup> | 22.38 <sup>B</sup> | 0.926 | 0.050    | 0.031   | 0.292 |
| PUFA                                                           | 4.59 <sup>a</sup>  | 8.77 <sup>b</sup>   | 9.41 <sup>b</sup>  | 9.42 <sup>b</sup>   | 0.420 | 8.54 <sup>A</sup>  | 7.56 <sup>B</sup>  | 0.225 | < 0.001  | < 0.001 | 0.001 |
| SFA                                                            | 68.95              | 65.48               | 68.95              | 69.00               | 1.600 | 66.13 <sup>A</sup> | 70.06 <sup>B</sup> | 1.009 | 0.287    | 0.009   | 0.119 |
| UFA                                                            | 31.05              | 34.52               | 31.05              | 31.00               | 1.600 | 33.87 <sup>A</sup> | 29.94 <sup>B</sup> | 1.009 | 0.287    | 0.009   | 0.119 |
| SFA/UFA                                                        | 2.25               | 1.97                | 2.27               | 2.35                | 0.155 | 2.03 <sup>A</sup>  | 2.40 <sup>B</sup>  | 0.100 | 0.308    | 0.009   | 0.036 |
| $\omega 6$                                                     | 3.15 <sup>ab</sup> | 3.44 <sup>a</sup>   | 2.84 <sup>b</sup>  | 2.70 <sup>b</sup>   | 0.175 | 3.02               | 3.04               | 0.105 | 0.035    | 0.852   | 0.072 |
| $\omega 3$                                                     | 0.46 <sup>a</sup>  | 1.29 <sup>b</sup>   | 2.03 <sup>c</sup>  | 2.41 <sup>d</sup>   | 0.090 | 1.60 <sup>A</sup>  | 1.50 <sup>B</sup>  | 0.053 | < 0.001  | 0.044   | 0.000 |
| $\omega 6/\omega 3$                                            | 7.3 <sup>a</sup>   | 2.72 <sup>b</sup>   | 1.42 <sup>bc</sup> | 1.13 <sup>c</sup>   | 0.500 | 3.04               | 3.24               | 0.308 | < 0.001  | 0.690   | 0.966 |
| AI                                                             | 2.24               | 2.18                | 2.74               | 2.68                | 0.190 | 2.23 <sup>A</sup>  | 2.68 <sup>B</sup>  | 0.124 | 0.111    | 0.011   | 0.029 |
| TI                                                             | 2.77               | 2.38                | 2.21               | 2.20                | 0.153 | 2.22 <sup>A</sup>  | 2.49 <sup>B</sup>  | 0.093 | 0.052    | 0.031   | 0.011 |
| HPI                                                            | 0.44               | 0.42                | 0.33               | 0.34                | 0.036 | 0.43               | 0.35               | 0.029 | 0.486    | 0.648   | 0.978 |
| <b><math>\Delta</math>-9 desaturase index</b>                  |                    |                     |                    |                     |       |                    |                    |       |          |         |       |
| C <sub>14:1</sub> / C <sub>14:0</sub>                          | 0.031              | 0.030               | 0.019              | 0.029               | 0.003 | 0.032 <sup>A</sup> | 0.022 <sup>B</sup> | 0.002 | 0.100    | 0.001   | 0.036 |
| C <sub>16:1</sub> / C <sub>16:0</sub>                          | 0.040 <sup>a</sup> | 0.029 <sup>b</sup>  | 0.026 <sup>b</sup> | 0.023 <sup>b</sup>  | 0.003 | 0.027 <sup>A</sup> | 0.032 <sup>B</sup> | 0.002 | 0.008    | 0.047   | 0.534 |
| cis-9 C <sub>18:1</sub> / C <sub>18:0</sub>                    | 2.28 <sup>a</sup>  | 4.58 <sup>b</sup>   | 4.91 <sup>b</sup>  | 4.55 <sup>b</sup>   | 0.325 | 3.77 <sup>A</sup>  | 4.39 <sup>B</sup>  | 0.178 | < 0.001  | 0.001   | 0.042 |
| cis-9, trans-11 C <sub>18:2</sub> / trans-11 C <sub>18:1</sub> | 0.61 <sup>a</sup>  | 0.38 <sup>b</sup>   | 0.44 <sup>ab</sup> | 0.46 <sup>b</sup>   | 0.044 | 0.48               | 0.48               | 0.026 | 0.006    | 0.968   | 0.055 |

Means with different superscript (a, b, c, d) between dietary treatments and (A, B) between sampling time differ significantly ( $p \leq 0.05$ ). CON = control concentrate without microalgae; ALG20 = control concentrate with 20 g/Kg *Schizochytrium* sp.; ALG40 = control concentrate with 40 g/Kg *Schizochytrium* sp.; ALG60 = control concentrate with 60 g/Kg *Schizochytrium* sp. ‡ Effect: The dietary treatment (T), time (S), and the interaction between dietary treatment x time (TxS) effects were analyzed by ANOVA using a general linear model (GLM) for repeated measures and Post hoc analysis was performed when appropriate using Tukey multiple range test.

†SEM: Standard error of the mean †† trans C18:1 proportion are not including the trans-11 C18:1 and trans-10 C18:1 content Short-Chain Saturated Fatty Acids (SCFA) = C6:0 + C8:0 + C10:0 + C11:0, Medium-Chain Saturated Fatty Acids (MCFA) = C12:0 + C13:0 + C14:0 + C15:0 + C16:0, Long-Chain Saturated Fatty Acids (LCFA) = C17:0 + C18:0 + C20:0, Mono-Unsaturated Fatty Acids (MUFA) = C14:1 + C15:1 + C16:1 + C17:1 + cis-9 C18:1 + trans-11 C18:1 + trans C18:1, Poly-Unsaturated Fatty Acids (PUFA) = cis-9, trans-11 C18:2 + C18:2n-6c + C18:2n-6t + C18:3n-3 + C18:3n-6 + C20:3n-3, Saturated Fatty Acids (SFA) = SCFA + MCFA + LCFA, Unsaturated Fatty Acids (UFA) = PUFA + MUFA, Saturated/Unsaturated (S/U) = (SCFA + MCFA + LCFA)/(PUFA + MUFA), Atherogenic index (AI) = (C12:0 + 4 × C14:0 + C16:0)/(PUFA + MUFA), Thrombogenic index (TI) = (C14:0 + C16:0 + C18:0)/(0.5 × MUFA) + (0.5 × n-6 PUFA) + (3 × ω3 PUFA) + (ω3 PUFA/ω6 PUFA), Health promoting index (HPI) = (ω6 PUFA + ω3 PUFA + MUF/(C12:0 + 4 × C14:0 + C16:0)).

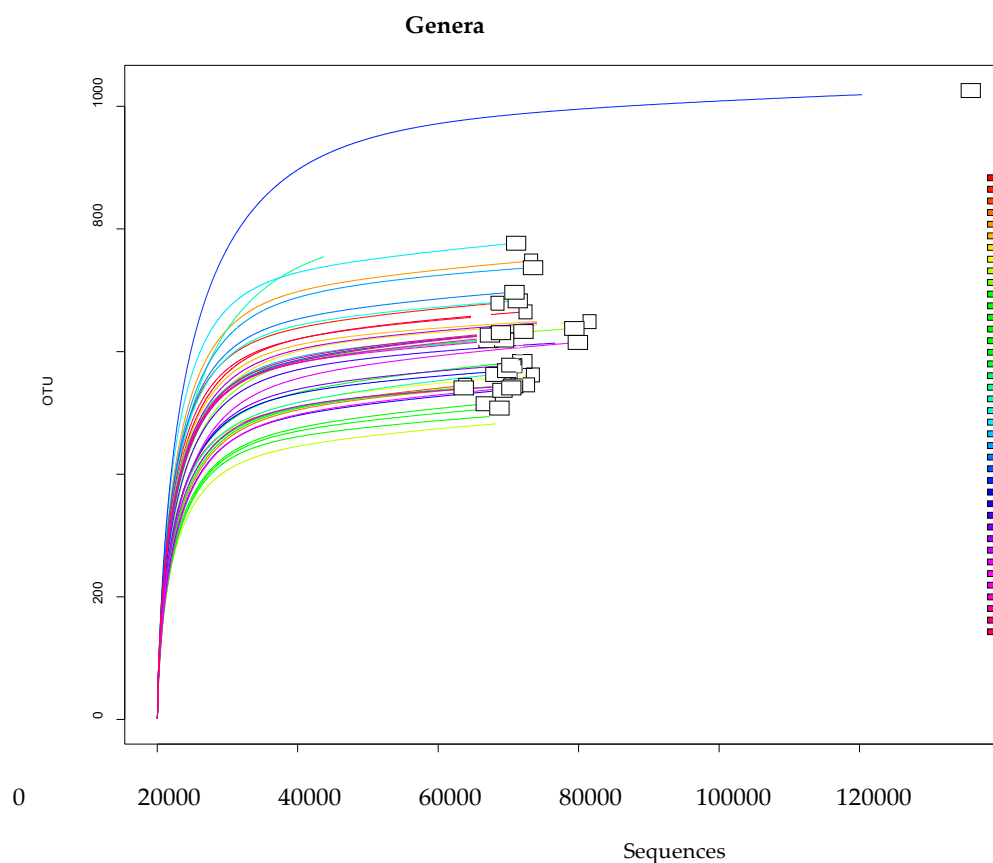

**Figure S1.** Rarefaction curves of bacterial population at genera taxonomic level for the 16S.

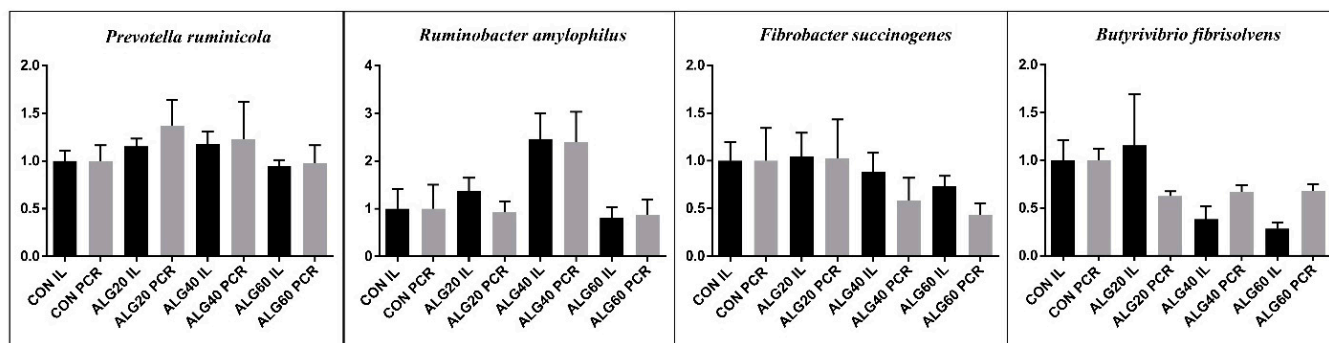

**Figure S2.** Validation of the 16S

rRNA sequencing (IL) by qPCR (PCR) on the relative abundances of *Prevotella ruminicola*, *Ruminobacter amylophilus*, *Fibrobacter succinogenes*, and *Butyrivibrio fibrisolvens*. The microalgae treated groups (ALG20, ALG40, and ALG60) of each method (IL vs. PCR) have been expressed relatively as fold changes towards to the control (CON) group in order to be similarly visualized. Data are depicted as trends and no statistic has been applied.

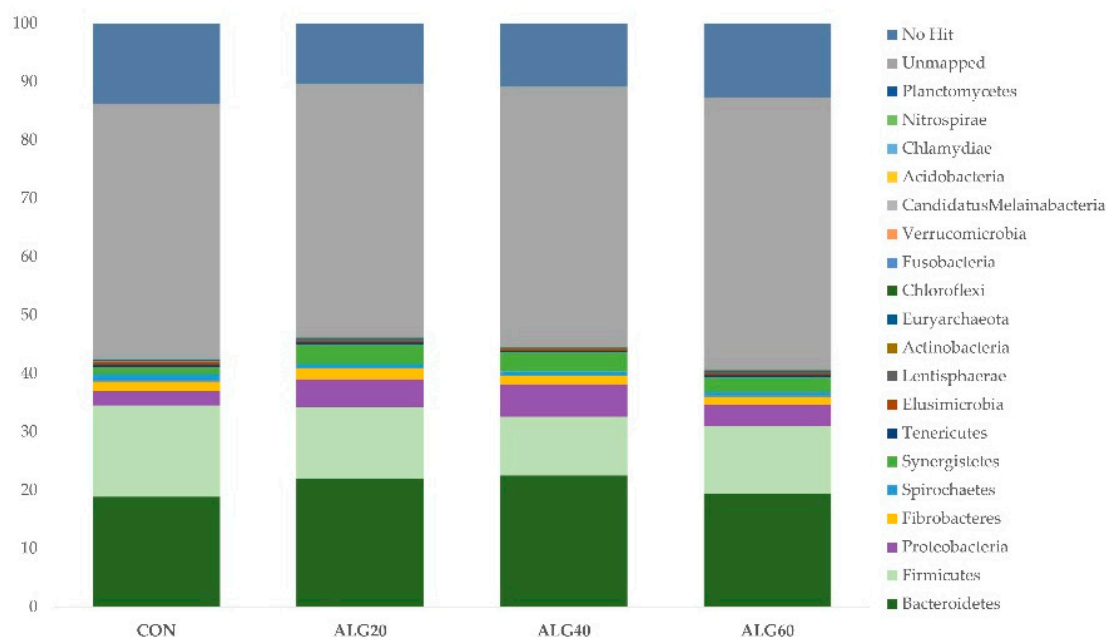

**Figure S3.** Relative abundance of identified phyla, unidentified clusters, and no-hits sequences in four dietary treatments (CON, ALG20, ALG40, and ALG60) within the two sampling times (20th and 40th) illustrated in cumulative bar graph.

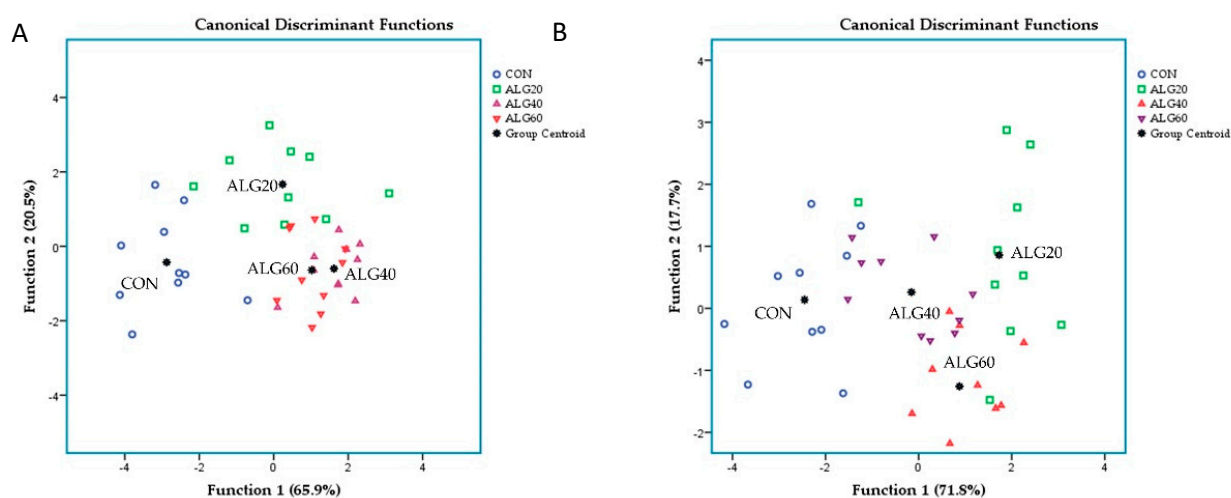

**Figure S4.** Discriminant plots separating (A) the four dietary treatments (CON; blue  $\circ$ , ALG20; green  $\square$ , ALG40; purple  $\triangle$ , and ALG60; red  $\nabla$ ) according to pooled data of two sampling times (20th and 40th experimental day) that entered independently together on the abundances explained A) the fourteen identified phyla and B) the thirty-four identified families in goats' rumen. In the (A) plot the proportions of the samples that were correctly classified were 80 %, while wilks'  $\lambda$  was observed at 0.067 for Function 1 ( $p < 0.001$ ) and 0.291 for Function 2 ( $p = 0.075$ ). In the (B) plot the proportions of the samples that were correctly classified were 82.5 %, while wilks'  $\lambda$  was observed at 0.115 for Function 1 ( $p = 0.013$ ) and 0.429 for Function 2 ( $p = 0.496$ ). CON = control concentrate without microalgae (*Schizochytrium* spp); ALG20 = CON with 20 g/Kg *Schizochytrium* spp.; ALG40 = CON with 40 g/Kg *Schizochytrium* spp.; ALG60 = CON with 60 g/Kg *Schizochytrium* spp.
